# Supplementary material for: Next-generation sequencing of newborn screening genes: the accuracy of short-read mapping
Source: PubMed Central journal article supplement (PMC7474066; doi:10.1038/s41525-020-00142-z), 2020-09-04
Supplement: 41525_2020_142_MOESM1_ESM.pdf [file 41525_2020_142_MOESM1_ESM.pdf]

## Supplementary Tables and Figures

**Supplementary Table 1. Results from the BLAST+ analysis.**

| Chr | Start     | End       | NBS Gene | Alignm<br>ent<br>Length | Mismatch<br>es | Hit Coordinates         |
|-----|-----------|-----------|----------|-------------------------|----------------|-------------------------|
| X   | 153740504 | 153740674 | ABCD1    | 0                       | 4              | chr10:38601352-38601521 |
| X   | 153740504 | 153740674 | ABCD1    | 0                       | 10             | chr16:32478319-32478035 |
| X   | 153740504 | 153740674 | ABCD1    | 0                       | 6              | chr16:32478319-32478150 |
| X   | 153740504 | 153740674 | ABCD1    | 0                       | 8              | chr22:16387625-16387794 |
| X   | 153740504 | 153740674 | ABCD1    | 0                       | 9              | chr2:91840543-91840712  |
| X   | 153740504 | 153740789 | ABCD1    | 0                       | 8              | chr22:16387625-16387794 |
| X   | 153740504 | 153740789 | ABCD1    | 0                       | 10             | chr16:32478319-32478035 |
| X   | 153740504 | 153740789 | ABCD1    | 0                       | 4              | chr10:38601352-38601521 |
| X   | 153740504 | 153740789 | ABCD1    | 0                       | 6              | chr16:32478319-32478150 |
| X   | 153740504 | 153740789 | ABCD1    | 0                       | 9              | chr2:91840543-91840712  |
| X   | 153742917 | 153743141 | ABCD1    | 0                       | 8              | chr2:91842988-91843211  |
| X   | 153742917 | 153743141 | ABCD1    | 0                       | 9              | chr22:16390067-16390290 |
| X   | 153742917 | 153743141 | ABCD1    | 0                       | 10             | chr2:89764989-89764766  |
| X   | 153742917 | 153743141 | ABCD1    | 0                       | 8              | chr16:32475874-32475651 |
| X   | 153743151 | 153743416 | ABCD1    | 5                       | 8              | chr22:16390301-16390560 |
| X   | 153743151 | 153743416 | ABCD1    | 5                       | 6              | chr2:91843222-91843480  |
| X   | 153743151 | 153743416 | ABCD1    | 5                       | 10             | chr10:38604029-38604288 |
| X   | 153743151 | 153743416 | ABCD1    | 2                       | 10             | chr16:32475640-32475378 |
| 21  | 43053121  | 43053717  | CBS      | 0                       | 0              | chr21:6444800-6445395   |
| 21  | 43053121  | 43053717  | CBS      | 0                       | 0              | chr21:6444800-6445731   |
| 21  | 43053121  | 43054053  | CBS      | 0                       | 0              | chr21:6444800-6445395   |
| 21  | 43053121  | 43054053  | CBS      | 0                       | 0              | chr21:6444800-6445731   |
| 21  | 43053685  | 43054053  | CBS      | 0                       | 0              | chr21:6445364-6445731   |

|    |          |          |     |   |   |                       |
|----|----------|----------|-----|---|---|-----------------------|
| 21 | 43053719 | 43054053 | CBS | 0 | 0 | chr21:6445398-6445731 |
| 21 | 43053792 | 43054053 | CBS | 0 | 0 | chr21:6445471-6445731 |
| 21 | 43055002 | 43056169 | CBS | 0 | 1 | chr21:6446681-6447847 |
| 21 | 43055513 | 43055971 | CBS | 0 | 1 | chr21:6447192-6447649 |
| 21 | 43055528 | 43055940 | CBS | 0 | 1 | chr21:6447207-6447618 |
| 21 | 43055988 | 43056169 | CBS | 0 | 0 | chr21:6447667-6447847 |
| 21 | 43056733 | 43056957 | CBS | 0 | 0 | chr21:6448412-6448635 |
| 21 | 43058075 | 43058323 | CBS | 0 | 0 | chr21:6449754-6450001 |
| 21 | 43058764 | 43059038 | CBS | 0 | 0 | chr21:6450443-6450689 |
| 21 | 43058764 | 43059038 | CBS | 0 | 0 | chr21:6450443-6450702 |
| 21 | 43058764 | 43059011 | CBS | 0 | 0 | chr21:6450443-6450716 |
| 21 | 43058764 | 43059011 | CBS | 0 | 0 | chr21:6450443-6450689 |
| 21 | 43058764 | 43059011 | CBS | 0 | 0 | chr21:6450443-6450702 |
| 21 | 43058764 | 43059024 | CBS | 0 | 0 | chr21:6450443-6450716 |
| 21 | 43058764 | 43059024 | CBS | 0 | 0 | chr21:6450443-6450689 |
| 21 | 43058764 | 43059024 | CBS | 0 | 0 | chr21:6450443-6450702 |
| 21 | 43058764 | 43059038 | CBS | 0 | 0 | chr21:6450443-6450716 |
| 21 | 43059156 | 43059373 | CBS | 0 | 0 | chr21:6450835-6451487 |
| 21 | 43059156 | 43059809 | CBS | 0 | 0 | chr21:6450835-6451051 |
| 21 | 43059156 | 43059809 | CBS | 0 | 0 | chr21:6450835-6451487 |
| 21 | 43059156 | 43059373 | CBS | 0 | 0 | chr21:6450835-6451051 |
| 21 | 43059206 | 43059373 | CBS | 0 | 0 | chr21:6450885-6451051 |
| 21 | 43060371 | 43060590 | CBS | 0 | 0 | chr21:6452050-6452268 |
| 21 | 43060371 | 43060590 | CBS | 0 | 0 | chr21:6452050-6452294 |
| 21 | 43060371 | 43060616 | CBS | 0 | 0 | chr21:6452050-6452268 |
| 21 | 43060371 | 43060616 | CBS | 0 | 0 | chr21:6452050-6452294 |
| 21 | 43061849 | 43062465 | CBS | 0 | 0 | chr21:6453528-6454143 |
| 21 | 43062241 | 43062465 | CBS | 0 | 0 | chr21:6453920-6454143 |

|    |          |          |     |   |   |                       |
|----|----------|----------|-----|---|---|-----------------------|
| 21 | 43062883 | 43063318 | CBS | 0 | 0 | chr21:6454562-6454826 |
| 21 | 43062883 | 43063148 | CBS | 0 | 0 | chr21:6454562-6454826 |
| 21 | 43062883 | 43063148 | CBS | 0 | 0 | chr21:6454562-6454996 |
| 21 | 43062883 | 43063318 | CBS | 0 | 0 | chr21:6454562-6454996 |
| 21 | 43063830 | 43064297 | CBS | 0 | 0 | chr21:6455509-6455975 |
| 21 | 43063830 | 43064297 | CBS | 0 | 0 | chr21:6455509-6455739 |
| 21 | 43063830 | 43064061 | CBS | 0 | 0 | chr21:6455509-6455975 |
| 21 | 43063830 | 43064061 | CBS | 0 | 0 | chr21:6455509-6455739 |
| 21 | 43065133 | 43065342 | CBS | 0 | 1 | chr21:6456812-6457020 |
| 21 | 43065317 | 43065591 | CBS | 0 | 0 | chr21:6456996-6457269 |
| 21 | 43065546 | 43065765 | CBS | 0 | 0 | chr21:6457225-6457443 |
| 21 | 43066173 | 43066447 | CBS | 0 | 1 | chr21:6457852-6458125 |
| 21 | 43067708 | 43068030 | CBS | 0 | 2 | chr21:6459387-6459708 |
| 21 | 43067708 | 43068030 | CBS | 0 | 3 | chr21:6459387-6460152 |
| 21 | 43067708 | 43068474 | CBS | 0 | 3 | chr21:6459387-6460152 |
| 21 | 43067708 | 43068474 | CBS | 0 | 2 | chr21:6459387-6459708 |
| 21 | 43068251 | 43068685 | CBS | 1 | 1 | chr21:6459930-6460364 |
| 21 | 43068334 | 43068685 | CBS | 1 | 0 | chr21:6460013-6460364 |
| 21 | 43068439 | 43068685 | CBS | 1 | 0 | chr21:6460118-6460364 |
| 21 | 43071915 | 43072271 | CBS | 0 | 0 | chr21:6463594-6463949 |
| 21 | 43073196 | 43073578 | CBS | 0 | 0 | chr21:6464875-6465051 |
| 21 | 43073196 | 43073578 | CBS | 0 | 0 | chr21:6464875-6465089 |
| 21 | 43073196 | 43073578 | CBS | 0 | 0 | chr21:6464875-6465256 |
| 21 | 43073196 | 43073373 | CBS | 0 | 0 | chr21:6464875-6465051 |
| 21 | 43073196 | 43073373 | CBS | 0 | 0 | chr21:6464875-6465089 |
| 21 | 43073196 | 43073373 | CBS | 0 | 0 | chr21:6464875-6465256 |
| 21 | 43073196 | 43073411 | CBS | 0 | 0 | chr21:6464875-6465256 |
| 21 | 43073196 | 43073411 | CBS | 0 | 0 | chr21:6464875-6465089 |

|    |           |           |        |   |   |                         |
|----|-----------|-----------|--------|---|---|-------------------------|
| 21 | 43073196  | 43073411  | CBS    | 0 | 0 | chr21:6464875-6465051   |
| 21 | 43075037  | 43075839  | CBS    | 0 | 0 | chr21:6466716-6467517   |
| 21 | 43075700  | 43075934  | CBS    | 0 | 0 | chr21:6467379-6467612   |
| 21 | 43075700  | 43075934  | CBS    | 0 | 1 | chr21:6467379-6467693   |
| 21 | 43075700  | 43075934  | CBS    | 0 | 0 | chr21:6467379-6467579   |
| 21 | 43075700  | 43076015  | CBS    | 0 | 0 | chr21:6467379-6467612   |
| 21 | 43075700  | 43076015  | CBS    | 0 | 1 | chr21:6467379-6467693   |
| 21 | 43075700  | 43076015  | CBS    | 0 | 0 | chr21:6467379-6467579   |
| 21 | 43075700  | 43075901  | CBS    | 0 | 0 | chr21:6467379-6467612   |
| 21 | 43075700  | 43075901  | CBS    | 0 | 1 | chr21:6467379-6467693   |
| 21 | 43075700  | 43075901  | CBS    | 0 | 0 | chr21:6467379-6467579   |
| 21 | 43076155  | 43076358  | CBS    | 0 | 0 | chr21:6467834-6468126   |
| 21 | 43076155  | 43076448  | CBS    | 0 | 0 | chr21:6467834-6468126   |
| 21 | 43076155  | 43076448  | CBS    | 0 | 0 | chr21:6467834-6468036   |
| 21 | 43076155  | 43076358  | CBS    | 0 | 0 | chr21:6467834-6468110   |
| 21 | 43076155  | 43076448  | CBS    | 0 | 0 | chr21:6467834-6468110   |
| 21 | 43076155  | 43076432  | CBS    | 0 | 0 | chr21:6467834-6468036   |
| 21 | 43076155  | 43076432  | CBS    | 0 | 0 | chr21:6467834-6468110   |
| 21 | 43076155  | 43076358  | CBS    | 0 | 0 | chr21:6467834-6468036   |
| 21 | 43076155  | 43076432  | CBS    | 0 | 0 | chr21:6467834-6468126   |
| 21 | 43076670  | 43077013  | CBS    | 0 | 1 | chr21:6468349-6468691   |
| 7  | 117548571 | 117548893 | CFTR   | 7 | 6 | chr20:25919736-25919428 |
| 7  | 117548571 | 117548893 | CFTR   | 7 | 9 | chr20:30215031-30214727 |
| 16 | 30188790  | 30189104  | CORO1A | 0 | 0 | chr16:29449452-29449765 |
| 16 | 30188790  | 30189104  | CORO1A | 0 | 0 | chr16:29449452-29449695 |
| 16 | 30188790  | 30189104  | CORO1A | 0 | 0 | chr16:29449452-29449806 |
| 16 | 30188790  | 30189104  | CORO1A | 0 | 0 | chr16:29449452-29449807 |
| 16 | 30188790  | 30189034  | CORO1A | 0 | 0 | chr16:29449452-29449765 |

|    |          |          |         |   |    |                          |
|----|----------|----------|---------|---|----|--------------------------|
| 16 | 30188790 | 30189034 | CORO1A  | 0 | 0  | chr16:29449452-29449695  |
| 16 | 30188790 | 30189034 | CORO1A  | 0 | 0  | chr16:29449452-29449806  |
| 16 | 30188790 | 30189034 | CORO1A  | 0 | 0  | chr16:29449452-29449807  |
| 16 | 30188790 | 30189145 | CORO1A  | 0 | 0  | chr16:29449452-29449806  |
| 16 | 30188790 | 30189145 | CORO1A  | 0 | 0  | chr16:29449452-29449695  |
| 16 | 30188790 | 30189145 | CORO1A  | 0 | 0  | chr16:29449452-29449807  |
| 16 | 30188790 | 30189146 | CORO1A  | 0 | 0  | chr16:29449452-29449695  |
| 16 | 30188790 | 30189146 | CORO1A  | 0 | 0  | chr16:29449452-29449806  |
| 16 | 30188790 | 30189146 | CORO1A  | 0 | 0  | chr16:29449452-29449807  |
| 16 | 30188790 | 30189145 | CORO1A  | 0 | 0  | chr16:29449452-29449765  |
| 16 | 30188790 | 30189146 | CORO1A  | 0 | 0  | chr16:29449452-29449765  |
| 15 | 74359453 | 74359673 | CYP11A1 | 3 | 10 | chr3:86386958-86387172   |
| 15 | 74359453 | 74359673 | CYP11A1 | 2 | 9  | chr2:75430762-75430983   |
| 15 | 74359453 | 74359673 | CYP11A1 | 1 | 10 | chr1:82360490-82360272   |
| 15 | 74359453 | 74359673 | CYP11A1 | 0 | 9  | chr1:163591375-163591594 |
| 15 | 74359453 | 74359673 | CYP11A1 | 4 | 10 | chr7:139093485-139093700 |
| 15 | 74359453 | 74359673 | CYP11A1 | 1 | 10 | chr7:75778978-75779198   |
| 15 | 74359453 | 74359673 | CYP11A1 | 1 | 10 | chr9:98275237-98275018   |
| 6  | 32038195 | 32038694 | CYP21A2 | 1 | 8  | chr6:32005461-32005960   |
| 6  | 32038246 | 32038694 | CYP21A2 | 0 | 6  | chr6:32005513-32005960   |
| 6  | 32038257 | 32038694 | CYP21A2 | 0 | 6  | chr6:32005524-32005960   |
| 6  | 32038270 | 32038881 | CYP21A2 | 3 | 10 | chr6:32005537-32006150   |
| 6  | 32038295 | 32038694 | CYP21A2 | 2 | 5  | chr6:32005564-32005960   |
| 6  | 32038295 | 32038694 | CYP21A2 | 1 | 9  | chr6:32005564-32006150   |
| 6  | 32038295 | 32038881 | CYP21A2 | 1 | 9  | chr6:32005564-32006150   |
| 6  | 32038295 | 32038881 | CYP21A2 | 2 | 5  | chr6:32005564-32005960   |
| 6  | 32038300 | 32038694 | CYP21A2 | 3 | 9  | chr6:32005567-32006150   |
| 6  | 32038300 | 32038881 | CYP21A2 | 0 | 5  | chr6:32005567-32005960   |

|   |          |          |         |   |    |                        |
|---|----------|----------|---------|---|----|------------------------|
| 6 | 32038300 | 32038881 | CYP21A2 | 3 | 9  | chr6:32005567-32006150 |
| 6 | 32038300 | 32038694 | CYP21A2 | 0 | 5  | chr6:32005567-32005960 |
| 6 | 32038312 | 32038694 | CYP21A2 | 1 | 3  | chr6:32005580-32005960 |
| 6 | 32038345 | 32038694 | CYP21A2 | 0 | 2  | chr6:32005612-32005960 |
| 6 | 32038346 | 32038694 | CYP21A2 | 0 | 2  | chr6:32005613-32005960 |
| 6 | 32038513 | 32038881 | CYP21A2 | 2 | 4  | chr6:32005781-32006150 |
| 6 | 32038652 | 32038881 | CYP21A2 | 3 | 4  | chr6:32005919-32006150 |
| 6 | 32038652 | 32039185 | CYP21A2 | 3 | 4  | chr6:32005919-32006150 |
| 6 | 32039024 | 32039318 | CYP21A2 | 0 | 9  | chr6:32006297-32006582 |
| 6 | 32039040 | 32039318 | CYP21A2 | 0 | 8  | chr6:32006313-32006582 |
| 6 | 32039144 | 32039318 | CYP21A2 | 0 | 0  | chr6:32006409-32006582 |
| 6 | 32039286 | 32039503 | CYP21A2 | 0 | 4  | chr6:32006551-32006818 |
| 6 | 32039286 | 32039503 | CYP21A2 | 0 | 1  | chr6:32006551-32006767 |
| 6 | 32039286 | 32039554 | CYP21A2 | 0 | 4  | chr6:32006551-32006818 |
| 6 | 32039286 | 32039554 | CYP21A2 | 0 | 1  | chr6:32006551-32006767 |
| 6 | 32039286 | 32039554 | CYP21A2 | 0 | 1  | chr6:32006551-32006791 |
| 6 | 32039286 | 32039503 | CYP21A2 | 0 | 1  | chr6:32006551-32006791 |
| 6 | 32039286 | 32039527 | CYP21A2 | 0 | 1  | chr6:32006551-32006791 |
| 6 | 32039286 | 32039527 | CYP21A2 | 0 | 1  | chr6:32006551-32006767 |
| 6 | 32039286 | 32039527 | CYP21A2 | 0 | 4  | chr6:32006551-32006818 |
| 6 | 32039476 | 32039710 | CYP21A2 | 0 | 10 | chr6:32006741-32007306 |
| 6 | 32039476 | 32039710 | CYP21A2 | 0 | 3  | chr6:32006741-32006974 |
| 6 | 32039476 | 32040042 | CYP21A2 | 0 | 3  | chr6:32006741-32006981 |
| 6 | 32039476 | 32040042 | CYP21A2 | 0 | 10 | chr6:32006741-32007306 |
| 6 | 32039476 | 32040042 | CYP21A2 | 0 | 3  | chr6:32006741-32006974 |
| 6 | 32039476 | 32039710 | CYP21A2 | 0 | 3  | chr6:32006741-32006981 |
| 6 | 32039476 | 32039717 | CYP21A2 | 0 | 3  | chr6:32006741-32006981 |
| 6 | 32039476 | 32039717 | CYP21A2 | 0 | 3  | chr6:32006741-32006974 |

|   |          |          |         |   |    |                        |
|---|----------|----------|---------|---|----|------------------------|
| 6 | 32039476 | 32039717 | CYP21A2 | 0 | 10 | chr6:32006741-32007306 |
| 6 | 32039515 | 32039717 | CYP21A2 | 0 | 3  | chr6:32006780-32006940 |
| 6 | 32039515 | 32039676 | CYP21A2 | 0 | 3  | chr6:32006780-32006940 |
| 6 | 32039515 | 32039676 | CYP21A2 | 0 | 3  | chr6:32006780-32006981 |
| 6 | 32039515 | 32039717 | CYP21A2 | 0 | 3  | chr6:32006780-32006981 |
| 6 | 32039679 | 32039826 | CYP21A2 | 0 | 4  | chr6:32006944-32007090 |
| 6 | 32039679 | 32039826 | CYP21A2 | 0 | 6  | chr6:32006944-32007169 |
| 6 | 32039679 | 32039893 | CYP21A2 | 0 | 6  | chr6:32006944-32007157 |
| 6 | 32039679 | 32039905 | CYP21A2 | 0 | 6  | chr6:32006944-32007157 |
| 6 | 32039679 | 32039826 | CYP21A2 | 0 | 6  | chr6:32006944-32007158 |
| 6 | 32039679 | 32039826 | CYP21A2 | 0 | 6  | chr6:32006944-32007157 |
| 6 | 32039679 | 32039893 | CYP21A2 | 0 | 4  | chr6:32006944-32007090 |
| 6 | 32039679 | 32039893 | CYP21A2 | 0 | 6  | chr6:32006944-32007169 |
| 6 | 32039679 | 32039893 | CYP21A2 | 0 | 6  | chr6:32006944-32007158 |
| 6 | 32039679 | 32039894 | CYP21A2 | 0 | 4  | chr6:32006944-32007090 |
| 6 | 32039679 | 32039894 | CYP21A2 | 0 | 6  | chr6:32006944-32007169 |
| 6 | 32039679 | 32039894 | CYP21A2 | 0 | 6  | chr6:32006944-32007158 |
| 6 | 32039679 | 32039905 | CYP21A2 | 0 | 6  | chr6:32006944-32007169 |
| 6 | 32039679 | 32039905 | CYP21A2 | 0 | 4  | chr6:32006944-32007090 |
| 6 | 32039679 | 32039894 | CYP21A2 | 0 | 6  | chr6:32006944-32007157 |
| 6 | 32039679 | 32039905 | CYP21A2 | 0 | 6  | chr6:32006944-32007158 |
| 6 | 32039935 | 32040275 | CYP21A2 | 1 | 3  | chr6:32007200-32007540 |
| 6 | 32040336 | 32040841 | CYP21A2 | 0 | 2  | chr6:32007602-32007919 |
| 6 | 32040336 | 32040841 | CYP21A2 | 0 | 3  | chr6:32007602-32008106 |
| 6 | 32040336 | 32040654 | CYP21A2 | 0 | 2  | chr6:32007602-32007919 |
| 6 | 32040336 | 32040654 | CYP21A2 | 0 | 3  | chr6:32007602-32008106 |
| 6 | 32040598 | 32040841 | CYP21A2 | 0 | 1  | chr6:32007864-32008106 |
| 6 | 32040799 | 32041740 | CYP21A2 | 0 | 9  | chr6:32008065-32008977 |

|    |          |          |         |    |   |                         |
|----|----------|----------|---------|----|---|-------------------------|
| 6  | 32040799 | 32041256 | CYP21A2 | 0  | 9 | chr6:32008065-32009005  |
| 6  | 32040799 | 32041740 | CYP21A2 | 0  | 9 | chr6:32008065-32009005  |
| 6  | 32040799 | 32041740 | CYP21A2 | 0  | 2 | chr6:32008065-32008521  |
| 6  | 32040799 | 32041256 | CYP21A2 | 0  | 2 | chr6:32008065-32008521  |
| 6  | 32040799 | 32041712 | CYP21A2 | 0  | 2 | chr6:32008065-32008521  |
| 6  | 32040799 | 32041712 | CYP21A2 | 0  | 9 | chr6:32008065-32008977  |
| 6  | 32040799 | 32041256 | CYP21A2 | 0  | 9 | chr6:32008065-32008977  |
| 6  | 32040799 | 32041712 | CYP21A2 | 0  | 9 | chr6:32008065-32009005  |
| 10 | 14934310 | 14934590 | DCLRE1C | 0  | 9 | chr10:15016839-15017114 |
| 10 | 14934375 | 14934590 | DCLRE1C | 0  | 6 | chr10:15016900-15017114 |
| 10 | 14934633 | 14934845 | DCLRE1C | 2  | 5 | chr10:15017158-15017365 |
| 10 | 14934653 | 14934845 | DCLRE1C | 2  | 5 | chr10:15017178-15017365 |
| 10 | 14939740 | 14939939 | DCLRE1C | 0  | 4 | chr10:15021735-15021933 |
| 10 | 14942044 | 14942505 | DCLRE1C | 10 | 9 | chr10:15024054-15024524 |
| 10 | 14942044 | 14942505 | DCLRE1C | 10 | 7 | chr10:15024054-15024329 |
| 10 | 14942044 | 14942310 | DCLRE1C | 10 | 7 | chr10:15024054-15024329 |
| 10 | 14942044 | 14942310 | DCLRE1C | 10 | 9 | chr10:15024054-15024524 |
| 15 | 82214647 | 82214925 | EFL1    | 0  | 2 | chr15:84126669-84126392 |
| 15 | 82214713 | 82214925 | EFL1    | 0  | 2 | chr15:84126603-84126392 |
| 15 | 82215513 | 82215733 | EFL1    | 1  | 9 | chr15:84125799-84125580 |
| 15 | 82219582 | 82219888 | EFL1    | 1  | 5 | chr15:84121738-84121432 |
| 15 | 82225095 | 82225334 | EFL1    | 2  | 2 | chr15:84116211-84115980 |
| 15 | 82227396 | 82227642 | EFL1    | 0  | 9 | chr15:84113760-84113517 |
| 15 | 82228964 | 82229180 | EFL1    | 5  | 5 | chr15:84112191-84111972 |
| 15 | 82233593 | 82233844 | EFL1    | 0  | 8 | chr15:84109566-84109316 |
| 15 | 82238237 | 82238591 | EFL1    | 0  | 7 | chr15:84104888-84104535 |
| 15 | 82238238 | 82238591 | EFL1    | 0  | 7 | chr15:84104887-84104535 |
| 15 | 82238384 | 82238591 | EFL1    | 0  | 1 | chr15:84104741-84104535 |



|    |          |          |       |   |    |                         |
|----|----------|----------|-------|---|----|-------------------------|
| 15 | 82241200 | 82241473 | EFL1  | 0 | 7  | chr15:84102233-84101961 |
| 15 | 82252621 | 82252845 | EFL1  | 0 | 3  | chr15:84090360-84090155 |
| 15 | 82252621 | 82252845 | EFL1  | 0 | 3  | chr15:84090360-84090139 |
| 15 | 82252621 | 82252829 | EFL1  | 0 | 3  | chr15:84090360-84090155 |
| 15 | 82252621 | 82252829 | EFL1  | 0 | 3  | chr15:84090360-84090139 |
| 15 | 82259018 | 82259225 | EFL1  | 5 | 8  | chr15:84084336-84084125 |
| 15 | 82261618 | 82261867 | EFL1  | 0 | 6  | chr15:84081314-84081070 |
| 15 | 82261659 | 82261861 | EFL1  | 0 | 4  | chr15:84081273-84081076 |
| 22 | 23573299 | 23573655 | IGLL1 | 3 | 8  | chr22:25320049-25319697 |
| 7  | 56017164 | 56017449 | PSPH  | 1 | 6  | chr7:55765013-55764728  |
| 7  | 56017207 | 56017449 | PSPH  | 1 | 5  | chr7:55764970-55764728  |
| 7  | 66988271 | 66988569 | SBDS  | 0 | 10 | chr7:72836803-72836507  |
| 7  | 66991067 | 66991371 | SBDS  | 0 | 3  | chr7:72833997-72833694  |
| 7  | 66993147 | 66993487 | SBDS  | 3 | 6  | chr7:72831867-72831535  |
| 7  | 66994142 | 66994412 | SBDS  | 0 | 5  | chr7:72830890-72830621  |
| 7  | 66994142 | 66994411 | SBDS  | 0 | 5  | chr7:72830890-72830622  |
| 7  | 66994142 | 66994411 | SBDS  | 0 | 5  | chr7:72830890-72830621  |
| 7  | 66994142 | 66994412 | SBDS  | 0 | 5  | chr7:72830890-72830622  |
| 7  | 66994150 | 66994436 | SBDS  | 0 | 5  | chr7:72830882-72830597  |
| 7  | 66994150 | 66994411 | SBDS  | 0 | 5  | chr7:72830882-72830597  |
| 7  | 66994150 | 66994436 | SBDS  | 0 | 5  | chr7:72830882-72830622  |
| 7  | 66994150 | 66994411 | SBDS  | 0 | 5  | chr7:72830882-72830622  |
| 7  | 66995220 | 66995363 | SBDS  | 0 | 3  | chr7:72829852-72829710  |
| 7  | 66995220 | 66995363 | SBDS  | 0 | 8  | chr7:72829852-72829437  |
| 7  | 66995220 | 66995363 | SBDS  | 0 | 9  | chr7:72829852-72829427  |
| 7  | 66995220 | 66995363 | SBDS  | 0 | 10 | chr7:72829852-72829402  |
| 7  | 66995220 | 66995636 | SBDS  | 0 | 3  | chr7:72829852-72829710  |
| 7  | 66995220 | 66995636 | SBDS  | 0 | 8  | chr7:72829852-72829437  |

|    |           |           |          |   |    |                          |
|----|-----------|-----------|----------|---|----|--------------------------|
| 7  | 66995220  | 66995636  | SBDS     | 0 | 9  | chr7:72829852-72829427   |
| 7  | 66995220  | 66995636  | SBDS     | 0 | 10 | chr7:72829852-72829402   |
| 7  | 66995220  | 66995646  | SBDS     | 0 | 3  | chr7:72829852-72829710   |
| 7  | 66995220  | 66995646  | SBDS     | 0 | 9  | chr7:72829852-72829427   |
| 7  | 66995220  | 66995646  | SBDS     | 0 | 10 | chr7:72829852-72829402   |
| 7  | 66995220  | 66995671  | SBDS     | 0 | 3  | chr7:72829852-72829710   |
| 7  | 66995220  | 66995671  | SBDS     | 0 | 8  | chr7:72829852-72829437   |
| 7  | 66995220  | 66995671  | SBDS     | 0 | 9  | chr7:72829852-72829427   |
| 7  | 66995220  | 66995671  | SBDS     | 0 | 10 | chr7:72829852-72829402   |
| 7  | 66995220  | 66995646  | SBDS     | 0 | 8  | chr7:72829852-72829437   |
| 7  | 66995225  | 66995657  | SBDS     | 0 | 9  | chr7:72829847-72829416   |
| 1  | 112956769 | 112957083 | SLC16A1  | 0 | 8  | chr1:112850241-112850554 |
| 13 | 40808368  | 40808666  | SLC25A15 | 4 | 5  | chr22:16646679-16646504  |
| 13 | 40808368  | 40808666  | SLC25A15 | 4 | 6  | chr21:10613444-10613269  |
| 13 | 40808368  | 40808666  | SLC25A15 | 4 | 9  | chr13:24943511-24943685  |
| 13 | 40808368  | 40808666  | SLC25A15 | 5 | 9  | chrY:26587630-26587454   |
| 13 | 40808368  | 40808666  | SLC25A15 | 5 | 6  | chr13:19415202-19415377  |
| 13 | 40808368  | 40808540  | SLC25A15 | 5 | 9  | chrY:26587630-26587454   |
| 13 | 40808368  | 40808540  | SLC25A15 | 4 | 6  | chr21:10613444-10613269  |
| 13 | 40808368  | 40808540  | SLC25A15 | 4 | 5  | chr22:16646679-16646504  |
| 13 | 40808368  | 40808540  | SLC25A15 | 4 | 9  | chr13:24943511-24943685  |
| 13 | 40808368  | 40808540  | SLC25A15 | 5 | 6  | chr13:19415202-19415377  |
| X  | 153688653 | 153688906 | SLC6A8   | 0 | 9  | chr16:32885422-32885170  |
| X  | 153688653 | 153688906 | SLC6A8   | 0 | 10 | chr16:33976118-33976370  |
| X  | 153689397 | 153689669 | SLC6A8   | 0 | 7  | chr16:33976871-33977134  |
| X  | 153689397 | 153689669 | SLC6A8   | 0 | 9  | chr16:32884665-32884402  |
| X  | 153690305 | 153690576 | SLC6A8   | 0 | 8  | chr16:32883772-32883502  |
| X  | 153690305 | 153690576 | SLC6A8   | 0 | 8  | chr16:33977764-33978034  |

|   |           |           |        |   |    |                         |
|---|-----------|-----------|--------|---|----|-------------------------|
| X | 153690305 | 153690722 | SLC6A8 | 0 | 8  | chr16:32883772-32883502 |
| X | 153690305 | 153690722 | SLC6A8 | 0 | 8  | chr16:33977764-33978034 |
| X | 153691234 | 153691623 | SLC6A8 | 0 | 10 | chr16:32882848-32882461 |
| X | 153691234 | 153691623 | SLC6A8 | 0 | 10 | chr16:33978688-33979075 |
| X | 153691293 | 153691577 | SLC6A8 | 0 | 7  | chr16:32882790-32882507 |
| X | 153691293 | 153691577 | SLC6A8 | 0 | 7  | chr16:33978746-33979029 |
| X | 153691391 | 153691623 | SLC6A8 | 0 | 7  | chr16:32882692-32882461 |
| X | 153691391 | 153691623 | SLC6A8 | 0 | 7  | chr16:33978844-33979075 |
| X | 153691905 | 153692152 | SLC6A8 | 0 | 7  | chr16:33979380-33979759 |
| X | 153691905 | 153692152 | SLC6A8 | 0 | 3  | chr16:33979380-33979626 |
| X | 153691905 | 153692152 | SLC6A8 | 0 | 3  | chr16:32882156-32881910 |
| X | 153691905 | 153692152 | SLC6A8 | 0 | 4  | chr16:33979380-33979651 |
| X | 153691905 | 153692152 | SLC6A8 | 0 | 4  | chr16:32882156-32881885 |
| X | 153691905 | 153692177 | SLC6A8 | 0 | 8  | chr16:32882156-32881777 |
| X | 153691905 | 153692177 | SLC6A8 | 0 | 7  | chr16:33979380-33979759 |
| X | 153691905 | 153692177 | SLC6A8 | 0 | 3  | chr16:32882156-32881910 |
| X | 153691905 | 153692177 | SLC6A8 | 0 | 4  | chr16:33979380-33979651 |
| X | 153691905 | 153692177 | SLC6A8 | 0 | 4  | chr16:32882156-32881885 |
| X | 153691905 | 153692177 | SLC6A8 | 0 | 3  | chr16:33979380-33979626 |
| X | 153691905 | 153692152 | SLC6A8 | 0 | 8  | chr16:32882156-32881777 |
| X | 153691905 | 153692285 | SLC6A8 | 0 | 8  | chr16:32882156-32881777 |
| X | 153691905 | 153692285 | SLC6A8 | 0 | 7  | chr16:33979380-33979759 |
| X | 153691905 | 153692285 | SLC6A8 | 0 | 3  | chr16:33979380-33979626 |
| X | 153691905 | 153692285 | SLC6A8 | 0 | 3  | chr16:32882156-32881910 |
| X | 153691905 | 153692285 | SLC6A8 | 0 | 4  | chr16:33979380-33979651 |
| X | 153691905 | 153692285 | SLC6A8 | 0 | 4  | chr16:32882156-32881885 |
| X | 153693257 | 153693436 | SLC6A8 | 0 | 6  | chr16:33980735-33980908 |
| X | 153693257 | 153693436 | SLC6A8 | 0 | 6  | chr16:32880801-32880628 |

|   |           |           |        |   |    |                         |
|---|-----------|-----------|--------|---|----|-------------------------|
| X | 153693422 | 153693656 | SLC6A8 | 1 | 7  | chr16:33980895-33981127 |
| X | 153693422 | 153693656 | SLC6A8 | 1 | 8  | chr16:32880641-32880409 |
| X | 153693835 | 153694087 | SLC6A8 | 0 | 9  | chr16:33981308-33981514 |
| X | 153693835 | 153694042 | SLC6A8 | 0 | 8  | chr16:32880228-32880022 |
| X | 153693835 | 153694042 | SLC6A8 | 0 | 9  | chr16:33981308-33981514 |
| X | 153693835 | 153694087 | SLC6A8 | 0 | 8  | chr16:32880228-32880022 |
| X | 153693835 | 153694703 | SLC6A8 | 0 | 9  | chr16:33981308-33981514 |
| X | 153693835 | 153694703 | SLC6A8 | 0 | 8  | chr16:32880228-32880022 |
| X | 153694060 | 153694337 | SLC6A8 | 2 | 9  | chr16:32880001-32879727 |
| X | 153694060 | 153694337 | SLC6A8 | 2 | 10 | chr16:33981535-33981809 |
| X | 153694067 | 153694234 | SLC6A8 | 0 | 7  | chr16:32879996-32879830 |
| X | 153694067 | 153694234 | SLC6A8 | 0 | 7  | chr16:33981540-33981706 |
| X | 153694134 | 153694337 | SLC6A8 | 0 | 5  | chr16:32879929-32879727 |
| X | 153694134 | 153694337 | SLC6A8 | 0 | 6  | chr16:33981607-33981809 |
| X | 153694274 | 153694490 | SLC6A8 | 0 | 7  | chr16:33981747-33981988 |
| X | 153694274 | 153694490 | SLC6A8 | 0 | 7  | chr16:33981747-33981962 |
| X | 153694274 | 153694490 | SLC6A8 | 0 | 7  | chr16:32879789-32879574 |
| X | 153694274 | 153694490 | SLC6A8 | 0 | 7  | chr16:32879789-32879548 |
| X | 153694274 | 153694516 | SLC6A8 | 0 | 7  | chr16:33981747-33981962 |
| X | 153694274 | 153694516 | SLC6A8 | 0 | 7  | chr16:32879789-32879574 |
| X | 153694274 | 153694516 | SLC6A8 | 0 | 7  | chr16:33981747-33981988 |
| X | 153694274 | 153694516 | SLC6A8 | 0 | 7  | chr16:32879789-32879548 |
| X | 153694463 | 153694703 | SLC6A8 | 0 | 6  | chr16:32879600-32879418 |
| X | 153694463 | 153694646 | SLC6A8 | 4 | 10 | chr16:32879600-32879368 |
| X | 153694463 | 153694646 | SLC6A8 | 0 | 6  | chr16:32879600-32879418 |
| X | 153694463 | 153694646 | SLC6A8 | 0 | 7  | chr16:33981936-33982118 |
| X | 153694463 | 153694703 | SLC6A8 | 0 | 7  | chr16:33981936-33982118 |
| X | 153694463 | 153694703 | SLC6A8 | 4 | 10 | chr16:32879600-32879368 |

|   |          |          |      |   |   |                        |
|---|----------|----------|------|---|---|------------------------|
| 5 | 70924960 | 70925254 | SMN1 | 0 | 0 | chr5:70049543-70049836 |
| 5 | 70924986 | 70925254 | SMN1 | 0 | 0 | chr5:70049569-70049836 |
| 5 | 70925005 | 70925254 | SMN1 | 0 | 0 | chr5:70049588-70049836 |
| 5 | 70925025 | 70925254 | SMN1 | 0 | 0 | chr5:70049608-70049836 |
| 5 | 70925034 | 70925254 | SMN1 | 0 | 0 | chr5:70049617-70049836 |
| 5 | 70938769 | 70938980 | SMN1 | 0 | 0 | chr5:70063346-70063556 |
| 5 | 70941319 | 70941578 | SMN1 | 0 | 0 | chr5:70065896-70066154 |
| 5 | 70942288 | 70942628 | SMN1 | 0 | 0 | chr5:70066865-70067204 |
| 5 | 70942402 | 70942628 | SMN1 | 0 | 0 | chr5:70066979-70067204 |
| 5 | 70942438 | 70942628 | SMN1 | 0 | 0 | chr5:70067015-70067204 |
| 5 | 70942448 | 70942628 | SMN1 | 0 | 0 | chr5:70067025-70067204 |
| 5 | 70942648 | 70942940 | SMN1 | 0 | 0 | chr5:70067225-70067516 |
| 5 | 70944379 | 70944635 | SMN1 | 0 | 0 | chr5:70068957-70069212 |
| 5 | 70944588 | 70944823 | SMN1 | 0 | 0 | chr5:70069166-70069400 |
| 5 | 70945996 | 70946149 | SMN1 | 0 | 0 | chr5:70070572-70070724 |
| 5 | 70945996 | 70946348 | SMN1 | 0 | 0 | chr5:70070572-70070724 |
| 5 | 70945996 | 70946348 | SMN1 | 0 | 0 | chr5:70070572-70070919 |
| 5 | 70945996 | 70946149 | SMN1 | 0 | 0 | chr5:70070572-70070821 |
| 5 | 70945996 | 70946149 | SMN1 | 0 | 0 | chr5:70070572-70070923 |
| 5 | 70945996 | 70946344 | SMN1 | 0 | 0 | chr5:70070572-70070821 |
| 5 | 70945996 | 70946149 | SMN1 | 0 | 0 | chr5:70070572-70070919 |
| 5 | 70945996 | 70946344 | SMN1 | 0 | 0 | chr5:70070572-70070923 |
| 5 | 70945996 | 70946344 | SMN1 | 0 | 0 | chr5:70070572-70070724 |
| 5 | 70945996 | 70946344 | SMN1 | 0 | 0 | chr5:70070572-70070919 |
| 5 | 70945996 | 70946348 | SMN1 | 0 | 0 | chr5:70070572-70070923 |
| 5 | 70945996 | 70946246 | SMN1 | 0 | 0 | chr5:70070572-70070821 |
| 5 | 70945996 | 70946246 | SMN1 | 0 | 0 | chr5:70070572-70070923 |
| 5 | 70945996 | 70946246 | SMN1 | 0 | 0 | chr5:70070572-70070724 |

|   |          |          |      |   |   |                        |
|---|----------|----------|------|---|---|------------------------|
| 5 | 70945996 | 70946348 | SMN1 | 0 | 0 | chr5:70070572-70070821 |
| 5 | 70945996 | 70946246 | SMN1 | 0 | 0 | chr5:70070572-70070919 |
| 5 | 70946019 | 70946246 | SMN1 | 0 | 0 | chr5:70070595-70070821 |
| 5 | 70946637 | 70946827 | SMN1 | 0 | 0 | chr5:70071213-70071460 |
| 5 | 70946637 | 70946827 | SMN1 | 0 | 0 | chr5:70071213-70071402 |
| 5 | 70946637 | 70946885 | SMN1 | 0 | 0 | chr5:70071213-70071460 |
| 5 | 70946637 | 70946885 | SMN1 | 0 | 0 | chr5:70071213-70071402 |
| 5 | 70951871 | 70952637 | SMN1 | 0 | 4 | chr5:70076452-70077217 |
| 5 | 70951871 | 70952637 | SMN1 | 0 | 2 | chr5:70076452-70076644 |
| 5 | 70951871 | 70952637 | SMN1 | 0 | 4 | chr5:70076452-70076997 |
| 5 | 70951871 | 70952064 | SMN1 | 0 | 2 | chr5:70076452-70076656 |
| 5 | 70951871 | 70952637 | SMN1 | 0 | 2 | chr5:70076452-70076656 |
| 5 | 70951871 | 70952076 | SMN1 | 0 | 2 | chr5:70076452-70076656 |
| 5 | 70951871 | 70952076 | SMN1 | 0 | 4 | chr5:70076452-70077217 |
| 5 | 70951871 | 70952076 | SMN1 | 0 | 2 | chr5:70076452-70076644 |
| 5 | 70951871 | 70952076 | SMN1 | 0 | 4 | chr5:70076452-70076997 |
| 5 | 70951871 | 70952417 | SMN1 | 0 | 4 | chr5:70076452-70076997 |
| 5 | 70951871 | 70952417 | SMN1 | 0 | 2 | chr5:70076452-70076644 |
| 5 | 70951871 | 70952064 | SMN1 | 0 | 4 | chr5:70076452-70077217 |
| 5 | 70951871 | 70952417 | SMN1 | 0 | 4 | chr5:70076452-70077217 |
| 5 | 70951871 | 70952064 | SMN1 | 0 | 2 | chr5:70076452-70076644 |
| 5 | 70951871 | 70952417 | SMN1 | 0 | 2 | chr5:70076452-70076656 |
| 5 | 70951871 | 70952064 | SMN1 | 0 | 4 | chr5:70076452-70076997 |
| 5 | 70952369 | 70953110 | SMN1 | 0 | 1 | chr5:70076950-70077690 |
| 5 | 70952369 | 70953110 | SMN1 | 0 | 1 | chr5:70076950-70077662 |
| 5 | 70952369 | 70953086 | SMN1 | 0 | 0 | chr5:70076950-70077230 |
| 5 | 70952369 | 70953110 | SMN1 | 0 | 1 | chr5:70076950-70077666 |
| 5 | 70952369 | 70952650 | SMN1 | 0 | 0 | chr5:70076950-70077230 |

|   |          |          |      |   |   |                        |
|---|----------|----------|------|---|---|------------------------|
| 5 | 70952369 | 70952650 | SMN1 | 0 | 1 | chr5:70076950-70077690 |
| 5 | 70952369 | 70953110 | SMN1 | 0 | 0 | chr5:70076950-70077230 |
| 5 | 70952369 | 70952650 | SMN1 | 0 | 1 | chr5:70076950-70077666 |
| 5 | 70952369 | 70952650 | SMN1 | 0 | 1 | chr5:70076950-70077662 |
| 5 | 70952369 | 70953082 | SMN1 | 0 | 1 | chr5:70076950-70077662 |
| 5 | 70952369 | 70953082 | SMN1 | 0 | 1 | chr5:70076950-70077666 |
| 5 | 70952369 | 70953082 | SMN1 | 0 | 1 | chr5:70076950-70077690 |
| 5 | 70952369 | 70953086 | SMN1 | 0 | 1 | chr5:70076950-70077690 |
| 5 | 70952369 | 70953086 | SMN1 | 0 | 1 | chr5:70076950-70077666 |
| 5 | 70952369 | 70953086 | SMN1 | 0 | 1 | chr5:70076950-70077662 |
| 5 | 70952369 | 70953082 | SMN1 | 0 | 0 | chr5:70076950-70077230 |
| 5 | 70953112 | 70954012 | SMN1 | 0 | 3 | chr5:70077693-70078592 |
| 5 | 70049542 | 70049836 | SMN2 | 0 | 0 | chr5:70924961-70925254 |
| 5 | 70049568 | 70049836 | SMN2 | 0 | 0 | chr5:70924987-70925254 |
| 5 | 70049584 | 70049836 | SMN2 | 0 | 0 | chr5:70925003-70925254 |
| 5 | 70049587 | 70049836 | SMN2 | 0 | 0 | chr5:70925006-70925254 |
| 5 | 70049594 | 70049836 | SMN2 | 0 | 0 | chr5:70925013-70925254 |
| 5 | 70049616 | 70049836 | SMN2 | 0 | 0 | chr5:70925035-70925254 |
| 5 | 70063341 | 70063556 | SMN2 | 0 | 0 | chr5:70938766-70938980 |
| 5 | 70063345 | 70063556 | SMN2 | 0 | 0 | chr5:70938770-70938980 |
| 5 | 70065895 | 70066154 | SMN2 | 0 | 0 | chr5:70941320-70941578 |
| 5 | 70066864 | 70067204 | SMN2 | 0 | 0 | chr5:70942289-70942628 |
| 5 | 70067014 | 70067204 | SMN2 | 0 | 0 | chr5:70942439-70942628 |
| 5 | 70067024 | 70067204 | SMN2 | 0 | 0 | chr5:70942449-70942628 |
| 5 | 70067029 | 70067204 | SMN2 | 0 | 0 | chr5:70942454-70942628 |
| 5 | 70067209 | 70067516 | SMN2 | 0 | 0 | chr5:70942634-70942940 |
| 5 | 70067224 | 70067516 | SMN2 | 0 | 0 | chr5:70942649-70942940 |
| 5 | 70068956 | 70069212 | SMN2 | 0 | 0 | chr5:70944380-70944635 |

|   |          |          |      |   |   |                        |
|---|----------|----------|------|---|---|------------------------|
| 5 | 70069163 | 70069400 | SMN2 | 0 | 0 | chr5:70944587-70944823 |
| 5 | 70069165 | 70069400 | SMN2 | 0 | 0 | chr5:70944589-70944823 |
| 5 | 70070571 | 70070919 | SMN2 | 0 | 0 | chr5:70945997-70946250 |
| 5 | 70070571 | 70070919 | SMN2 | 0 | 0 | chr5:70945997-70946149 |
| 5 | 70070571 | 70070724 | SMN2 | 0 | 0 | chr5:70945997-70946344 |
| 5 | 70070571 | 70070724 | SMN2 | 0 | 0 | chr5:70945997-70946248 |
| 5 | 70070571 | 70070919 | SMN2 | 0 | 0 | chr5:70945997-70946246 |
| 5 | 70070571 | 70070919 | SMN2 | 0 | 0 | chr5:70945997-70946344 |
| 5 | 70070571 | 70070724 | SMN2 | 0 | 0 | chr5:70945997-70946149 |
| 5 | 70070571 | 70070823 | SMN2 | 0 | 0 | chr5:70945997-70946248 |
| 5 | 70070571 | 70070823 | SMN2 | 0 | 0 | chr5:70945997-70946344 |
| 5 | 70070571 | 70070823 | SMN2 | 0 | 0 | chr5:70945997-70946149 |
| 5 | 70070571 | 70070823 | SMN2 | 0 | 0 | chr5:70945997-70946250 |
| 5 | 70070571 | 70070823 | SMN2 | 0 | 0 | chr5:70945997-70946246 |
| 5 | 70070571 | 70070919 | SMN2 | 0 | 0 | chr5:70945997-70946248 |
| 5 | 70070571 | 70070821 | SMN2 | 0 | 0 | chr5:70945997-70946248 |
| 5 | 70070571 | 70070821 | SMN2 | 0 | 0 | chr5:70945997-70946344 |
| 5 | 70070571 | 70070821 | SMN2 | 0 | 0 | chr5:70945997-70946149 |
| 5 | 70070571 | 70070821 | SMN2 | 0 | 0 | chr5:70945997-70946250 |
| 5 | 70070571 | 70070821 | SMN2 | 0 | 0 | chr5:70945997-70946246 |
| 5 | 70070571 | 70070825 | SMN2 | 0 | 0 | chr5:70945997-70946246 |
| 5 | 70070571 | 70070724 | SMN2 | 0 | 0 | chr5:70945997-70946250 |
| 5 | 70070571 | 70070724 | SMN2 | 0 | 0 | chr5:70945997-70946246 |
| 5 | 70070571 | 70070825 | SMN2 | 0 | 0 | chr5:70945997-70946248 |
| 5 | 70070571 | 70070825 | SMN2 | 0 | 0 | chr5:70945997-70946344 |
| 5 | 70070571 | 70070825 | SMN2 | 0 | 0 | chr5:70945997-70946250 |
| 5 | 70070571 | 70070825 | SMN2 | 0 | 0 | chr5:70945997-70946149 |
| 5 | 70070594 | 70070821 | SMN2 | 0 | 0 | chr5:70946020-70946246 |



|   |          |          |      |   |    |                           |
|---|----------|----------|------|---|----|---------------------------|
| 5 | 70071101 | 70071252 | SMN2 | 0 | 10 | chr2:2922897-2922748      |
| 5 | 70071101 | 70071252 | SMN2 | 1 | 10 | chr2:100579768-100579918  |
| 5 | 70071101 | 70071252 | SMN2 | 1 | 10 | chr7:116514450-116514300  |
| 5 | 70071101 | 70071252 | SMN2 | 0 | 10 | chr6:107041233-107041084  |
| 5 | 70071101 | 70071252 | SMN2 | 1 | 8  | chr6:161320892-161320742  |
| 5 | 70071101 | 70071252 | SMN2 | 1 | 10 | chr1:174196233-174196383  |
| 5 | 70071101 | 70071252 | SMN2 | 1 | 9  | chr4:164978714-164978864  |
| 5 | 70071101 | 70071252 | SMN2 | 1 | 10 | chr4:138228767-138228617  |
| 5 | 70071101 | 70071252 | SMN2 | 1 | 9  | chr4:36594102-36593952    |
| 5 | 70071101 | 70071252 | SMN2 | 1 | 10 | chr16:57063748-57063898   |
| 5 | 70071101 | 70071252 | SMN2 | 0 | 10 | chr10:74087357-74087506   |
| 5 | 70071101 | 70071252 | SMN2 | 1 | 10 | chr16:74595545-74595397   |
| 5 | 70071101 | 70071252 | SMN2 | 1 | 9  | chr19:21469174-21469324   |
| 5 | 70071101 | 70071252 | SMN2 | 1 | 10 | chr19:31940436-31940286   |
| 5 | 70071101 | 70071252 | SMN2 | 1 | 10 | chr19:43618044-43618194   |
| 5 | 70071101 | 70071252 | SMN2 | 4 | 9  | chr12:100066812-100066667 |
| 5 | 70071101 | 70071252 | SMN2 | 1 | 9  | chr12:118317310-118317458 |
| 5 | 70071101 | 70071252 | SMN2 | 0 | 10 | chr12:13419883-13419733   |
| 5 | 70071101 | 70071252 | SMN2 | 0 | 10 | chr12:31454828-31454978   |
| 5 | 70071101 | 70071252 | SMN2 | 0 | 10 | chr12:86042876-86042726   |
| 5 | 70071101 | 70071252 | SMN2 | 1 | 10 | chr12:25158237-25158087   |
| 5 | 70071101 | 70071252 | SMN2 | 1 | 10 | chr12:46931494-46931344   |
| 5 | 70071101 | 70071252 | SMN2 | 1 | 10 | chr12:77015749-77015899   |
| 5 | 70071101 | 70071252 | SMN2 | 1 | 10 | chr12:108444537-108444387 |
| 5 | 70071101 | 70071252 | SMN2 | 0 | 10 | chr3:10812968-10813118    |
| 5 | 70071101 | 70071252 | SMN2 | 1 | 10 | chr5:31257174-31257321    |
| 5 | 70071101 | 70071252 | SMN2 | 0 | 1  | chr5:70946527-70946677    |

|   |          |          |      |   |    |                          |
|---|----------|----------|------|---|----|--------------------------|
| 5 | 70071101 | 70071252 | SMN2 | 0 | 10 | chr5:176378901-176378751 |
| 5 | 70071101 | 70071252 | SMN2 | 1 | 9  | chrX:84094652-84094503   |
| 5 | 70071101 | 70071252 | SMN2 | 5 | 10 | chrX:30832980-30833125   |
| 5 | 70071101 | 70071252 | SMN2 | 0 | 10 | chr13:21772924-21772774  |
| 5 | 70071101 | 70071252 | SMN2 | 0 | 10 | chrX:49801611-49801461   |
| 5 | 70071101 | 70071252 | SMN2 | 1 | 9  | chrX:51585737-51585887   |
| 5 | 70071101 | 70071252 | SMN2 | 6 | 10 | chr11:97084300-97084156  |
| 5 | 70071101 | 70071252 | SMN2 | 4 | 8  | chr8:87005378-87005233   |
| 5 | 70071101 | 70071252 | SMN2 | 1 | 10 | chr8:125685538-125685688 |
| 5 | 70071101 | 70071252 | SMN2 | 0 | 9  | chr17:74292839-74292988  |
| 5 | 70071101 | 70071252 | SMN2 | 1 | 10 | chr17:29349731-29349881  |
| 5 | 70071101 | 70071252 | SMN2 | 1 | 10 | chr20:14485710-14485559  |
| 5 | 70071101 | 70071252 | SMN2 | 0 | 10 | chr14:96287262-96287113  |
| 5 | 70071101 | 70071252 | SMN2 | 1 | 9  | chr15:75091635-75091485  |
| 5 | 70071101 | 70071252 | SMN2 | 1 | 10 | chr15:85575700-85575550  |
| 5 | 70071212 | 70071402 | SMN2 | 0 | 0  | chr5:70946638-70946885   |
| 5 | 70071212 | 70071402 | SMN2 | 0 | 0  | chr5:70946638-70946827   |
| 5 | 70071212 | 70071460 | SMN2 | 0 | 0  | chr5:70946638-70946885   |
| 5 | 70071212 | 70071460 | SMN2 | 0 | 0  | chr5:70946638-70946827   |
| 5 | 70076451 | 70076997 | SMN2 | 0 | 4  | chr5:70951872-70952417   |
| 5 | 70076451 | 70076997 | SMN2 | 0 | 3  | chr5:70951872-70952196   |
| 5 | 70076451 | 70076997 | SMN2 | 0 | 2  | chr5:70951872-70952064   |
| 5 | 70076451 | 70076997 | SMN2 | 0 | 2  | chr5:70951872-70952076   |
| 5 | 70076451 | 70076656 | SMN2 | 0 | 2  | chr5:70951872-70952064   |
| 5 | 70076451 | 70076656 | SMN2 | 0 | 3  | chr5:70951872-70952196   |
| 5 | 70076451 | 70076656 | SMN2 | 0 | 4  | chr5:70951872-70952417   |
| 5 | 70076451 | 70076656 | SMN2 | 0 | 2  | chr5:70951872-70952076   |
| 5 | 70076451 | 70076776 | SMN2 | 0 | 2  | chr5:70951872-70952076   |

|    |          |          |        |   |   |                         |
|----|----------|----------|--------|---|---|-------------------------|
| 5  | 70076451 | 70076644 | SMN2   | 0 | 2 | chr5:70951872-70952064  |
| 5  | 70076451 | 70076644 | SMN2   | 0 | 3 | chr5:70951872-70952196  |
| 5  | 70076451 | 70076644 | SMN2   | 0 | 4 | chr5:70951872-70952417  |
| 5  | 70076451 | 70076644 | SMN2   | 0 | 2 | chr5:70951872-70952076  |
| 5  | 70076451 | 70076776 | SMN2   | 0 | 4 | chr5:70951872-70952417  |
| 5  | 70076451 | 70076776 | SMN2   | 0 | 3 | chr5:70951872-70952196  |
| 5  | 70076451 | 70076776 | SMN2   | 0 | 2 | chr5:70951872-70952064  |
| 5  | 70076949 | 70077321 | SMN2   | 0 | 1 | chr5:70952370-70952741  |
| 5  | 70076949 | 70077321 | SMN2   | 0 | 1 | chr5:70952370-70953082  |
| 5  | 70076949 | 70077321 | SMN2   | 0 | 1 | chr5:70952370-70953086  |
| 5  | 70076949 | 70077321 | SMN2   | 0 | 0 | chr5:70952370-70952650  |
| 5  | 70076949 | 70077230 | SMN2   | 0 | 1 | chr5:70952370-70953082  |
| 5  | 70076949 | 70077230 | SMN2   | 0 | 1 | chr5:70952370-70953086  |
| 5  | 70076949 | 70077230 | SMN2   | 0 | 1 | chr5:70952370-70952741  |
| 5  | 70076949 | 70077230 | SMN2   | 0 | 0 | chr5:70952370-70952650  |
| 5  | 70076949 | 70077666 | SMN2   | 0 | 0 | chr5:70952370-70952650  |
| 5  | 70076949 | 70077662 | SMN2   | 0 | 1 | chr5:70952370-70953082  |
| 5  | 70076949 | 70077662 | SMN2   | 0 | 1 | chr5:70952370-70953086  |
| 5  | 70076949 | 70077662 | SMN2   | 0 | 1 | chr5:70952370-70952741  |
| 5  | 70076949 | 70077662 | SMN2   | 0 | 0 | chr5:70952370-70952650  |
| 5  | 70076949 | 70077666 | SMN2   | 0 | 1 | chr5:70952370-70952741  |
| 5  | 70076949 | 70077666 | SMN2   | 0 | 1 | chr5:70952370-70953082  |
| 5  | 70076949 | 70077666 | SMN2   | 0 | 1 | chr5:70952370-70953086  |
| 5  | 70077692 | 70078592 | SMN2   | 0 | 3 | chr5:70953113-70954012  |
| 17 | 42218653 | 42218948 | STAT5B | 0 | 3 | chr17:42300939-42300645 |
| 17 | 42219242 | 42219533 | STAT5B | 0 | 1 | chr17:42300350-42300060 |
| 17 | 42219642 | 42219912 | STAT5B | 0 | 6 | chr17:42299950-42299681 |

**Supplementary Table 2. Genes with BLAST+ hits or GEM scores  $\leq 0.5$  which were then used for simulation analyses.**

| Chromosome | Start     | End       | Gene Name |
|------------|-----------|-----------|-----------|
| X          | 153724856 | 153744755 | ABCD1     |
| 1          | 75724347  | 75787575  | ACADM     |
| 12         | 120725774 | 120740008 | ACADS     |
| 10         | 123008979 | 123058311 | ACADSB    |
| 17         | 7217125   | 7225266   | ACADVL    |
| 11         | 108121516 | 108147776 | ACAT1     |
| 20         | 44619522  | 44652233  | ADA       |
| 10         | 74151185  | 74709303  | ADK       |
| 20         | 34280268  | 34311802  | AHCY      |
| 1          | 33007940  | 33080996  | AK2       |
| 5          | 126531200 | 126595362 | ALDH7A1   |
| 6          | 131573144 | 131584332 | ARG1      |
| 7          | 99374249  | 99394816  | ARPC1B    |
| 22         | 50622754  | 50628173  | ARSA      |
| 7          | 66075798  | 66093558  | ASL       |
| 9          | 130444929 | 130501274 | ASS1      |
| 11         | 108222484 | 108369102 | ATM       |
| 19         | 41397808  | 41425002  | BCKDHA    |
| 6          | 80106647  | 80346270  | BCKDHB    |
| 16         | 31106107  | 31112791  | BCKDK     |
| 14         | 99169287  | 99272197  | BCL11B    |
| 10         | 96191702  | 96271587  | BLNK      |
| 3          | 15601341  | 15647640  | BTD       |
| X          | 101349447 | 101390796 | BTK       |
| 16         | 67644988  | 67657569  | CARMIL2   |
| 21         | 43053191  | 43076943  | CBS       |

|    |           |           |         |
|----|-----------|-----------|---------|
| 1  | 167430640 | 167518610 | CD247   |
| 11 | 118338954 | 118342744 | CD3D    |
| 11 | 118304545 | 118316175 | CD3E    |
| 11 | 118344344 | 118355161 | CD3G    |
| 19 | 41877120  | 41881372  | CD79A   |
| 7  | 117465784 | 117715971 | CFTR    |
| 8  | 60678740  | 60868028  | CHD7    |
| 16 | 30182827  | 30189076  | CORO1A  |
| 2  | 210477682 | 210679107 | CPS1    |
| 11 | 68754620  | 68844410  | CPT1A   |
| 1  | 53196792  | 53214197  | CPT2    |
| 15 | 74337759  | 74367646  | CYP11A1 |
| 10 | 102830531 | 102837472 | CYP17A1 |
| 6  | 32038265  | 32041670  | CYP21A2 |
| 1  | 100186919 | 100249834 | DBT     |
| 10 | 14897359  | 14954432  | DCLRE1C |
| X  | 154762742 | 154777689 | DKC1    |
| 7  | 107891162 | 107931730 | DLD     |
| X  | 31097677  | 33339441  | DMD     |
| 20 | 32762385  | 32809356  | DNMT3B  |
| 5  | 169637247 | 170083382 | DOCK2   |
| 9  | 214854    | 465259    | DOCK8   |
| 15 | 82130233  | 82262734  | EFL1    |
| 15 | 76215353  | 76311472  | ETFA    |
| 19 | 51345169  | 51366418  | ETFB    |
| 4  | 158672125 | 158709623 | ETFDH   |
| 8  | 28600469  | 28755599  | EXTL3   |
| 15 | 80152490  | 80186946  | FAH     |

|    |           |           |         |
|----|-----------|-----------|---------|
| 17 | 28506243  | 28538896  | FOXN1   |
| 17 | 80101556  | 80119881  | GAA     |
| 1  | 23795599  | 23800781  | GALE    |
| 17 | 75751594  | 75765711  | GALK1   |
| 3  | 128479427 | 128493185 | GATA2   |
| 15 | 45361124  | 45402327  | GATM    |
| 19 | 12891160  | 12914207  | GCDH    |
| 2  | 26190635  | 26244672  | HADHA   |
| 2  | 26243170  | 26290465  | HADHB   |
| 21 | 36750888  | 36990236  | HLCS    |
| 1  | 23801885  | 23838620  | HMGCL   |
| 1  | 119747996 | 119768905 | HMGCS2  |
| 12 | 121839527 | 121863596 | HPD     |
| 4  | 174490175 | 174523154 | HPGD    |
| 4  | 986997    | 1004564   | IDUA    |
| 22 | 23573125  | 23580302  | IGLL1   |
| 8  | 42271302  | 42332653  | IKBKB   |
| 7  | 50304068  | 50405101  | IKZF1   |
| 5  | 35852695  | 35879603  | IL7R    |
| 15 | 40405485  | 40435947  | IVD     |
| 19 | 17824780  | 17848071  | JAK3    |
| 16 | 28984826  | 28990783  | LAT     |
| 1  | 32251239  | 32286165  | LCK     |
| 13 | 108207439 | 108218368 | LIG4    |
| 6  | 69672757  | 69867236  | LMBRD1  |
| 9  | 128882112 | 128918039 | LRRRC8A |
| 1  | 89524836  | 89597864  | LRRRC8B |
| 1  | 89633072  | 89769903  | LRRRC8C |

|    |           |           |        |
|----|-----------|-----------|--------|
| 1  | 89821014  | 89936611  | LRRC8D |
| 19 | 7888505   | 7902021   | LRRC8E |
| 18 | 13882044  | 13915707  | MC2R   |
| 3  | 183015218 | 183116075 | MCCC1  |
| 5  | 71587288  | 71658706  | MCCC2  |
| 4  | 145599042 | 145660035 | MMAA   |
| 12 | 109553715 | 109573580 | MMAB   |
| 1  | 45500300  | 45513382  | MMACHC |
| 2  | 149569637 | 149587778 | MMADHC |
| 6  | 49430360  | 49463253  | MMUT   |
| 1  | 11785723  | 11806920  | MTHFR  |
| 1  | 236795292 | 236921278 | MTR    |
| 5  | 36192589  | 36242279  | NADK2  |
| 17 | 44004546  | 44009063  | NAGS   |
| 8  | 89933336  | 90003228  | NBN    |
| 2  | 219075317 | 219160865 | NHEJ1  |
| 18 | 23506184  | 23586506  | NPC1   |
| 14 | 74476192  | 74494177  | NPC2   |
| 7  | 44379119  | 44490658  | NUDCD3 |
| X  | 38352586  | 38421446  | OTC    |
| 12 | 102836889 | 102958410 | PAH    |
| 20 | 21705659  | 21718486  | PAX1   |
| 10 | 70882280  | 70888565  | PCBD1  |
| 13 | 100089015 | 100530437 | PCCA   |
| 3  | 136250340 | 136337896 | PCCB   |
| 6  | 83161150  | 83193936  | PGM3   |
| 1  | 9651732   | 9729114   | PIK3CD |
| 5  | 68215756  | 68301821  | PIK3R1 |

|    |           |           |          |
|----|-----------|-----------|----------|
| 14 | 20468954  | 20477094  | PNP      |
| 7  | 75899200  | 75986855  | POR      |
| 8  | 47773108  | 47960183  | PRKDC    |
| 10 | 71816298  | 71851325  | PSAP     |
| 9  | 78297125  | 78330093  | PSAT1    |
| 7  | 56011051  | 56051604  | PSPH     |
| 1  | 198638457 | 198757476 | PTPRC    |
| 11 | 112226367 | 112269955 | PTS      |
| 4  | 17460261  | 17512206  | QDPR     |
| 22 | 37225270  | 37244448  | RAC2     |
| 11 | 36510709  | 36593156  | RAG1     |
| 11 | 36575574  | 36598279  | RAG2     |
| 8  | 144511288 | 144517845 | RECQL4   |
| 7  | 66987680  | 66995587  | SBDS     |
| 1  | 112911847 | 112957013 | SLC16A1  |
| 5  | 132369752 | 132395614 | SLC22A5  |
| 7  | 96120220  | 96322147  | SLC25A13 |
| 13 | 40789412  | 40812460  | SLC25A15 |
| 3  | 48856926  | 48898904  | SLC25A20 |
| 17 | 28394642  | 28407197  | SLC46A1  |
| 20 | 760080    | 776015    | SLC52A3  |
| X  | 153687926 | 153696588 | SLC6A8   |
| 2  | 216412414 | 216483053 | SMARCAL1 |
| 5  | 70925030  | 70953942  | SMN1     |
| 5  | 70049612  | 70078522  | SMN2     |
| 17 | 42199168  | 42276707  | STAT5B   |
| 11 | 3854527   | 4093210   | STIM1    |
| 16 | 71565660  | 71577092  | TAT      |



|    |           |           |        |
|----|-----------|-----------|--------|
| 22 | 19756703  | 19783593  | TBX1   |
| 2  | 46916157  | 47076137  | TTC7A  |
| 17 | 28546707  | 28552668  | UNC119 |
| X  | 48676596  | 48691427  | WAS    |
| 2  | 97713560  | 97739862  | ZAP70  |
| 6  | 109462594 | 109483237 | ZBTB24 |

**Supplementary Table 3. Mapping accuracy of 150bp reads in simulated NBS genes by population**

| MQ Threshold | Population | % Correct | % Incorrect | % Unmapped |
|--------------|------------|-----------|-------------|------------|
| 10           | GIH        | 99.44     | 0.0002      | 0.56       |
|              | CLM        | 99.44     | 0.0004      | 0.56       |
|              | CHS        | 99.44     | 0.0003      | 0.56       |
|              | FIN        | 99.44     | 0.0003      | 0.56       |
|              | GWD        | 99.44     | 0.0003      | 0.56       |
| 20           | GIH        | 99.38     | 0.0002      | 0.62       |
|              | CLM        | 99.38     | 0.0003      | 0.62       |
|              | CHS        | 99.38     | 0.0003      | 0.62       |
|              | FIN        | 99.38     | 0.0002      | 0.62       |
|              | GWD        | 99.38     | 0.0002      | 0.62       |

**Supplementary Table 4. Mapping accuracy of reads in simulated NBS genes by read length across all populations**

| MQ Threshold | Read Length | % Correct | % Incorrect | % Unmapped |
|--------------|-------------|-----------|-------------|------------|
| 10           | 70          | 99.17     | 0.0010      | 0.83       |
|              | 100         | 99.32     | 0.0004      | 0.68       |
|              | 150         | 99.44     | 0.0003      | 0.56       |
|              | 250         | 99.54     | 0.0003      | 0.46       |
| 20           | 70          | 99.02     | 0.0006      | 0.98       |
|              | 100         | 99.22     | 0.0003      | 0.78       |
|              | 150         | 99.38     | 0.0002      | 0.62       |
|              | 250         | 99.51     | 0.0002      | 0.48       |

**Supplementary Table 5. Simulated NBS genes with low depth (<20X) regions with MQ $\geq$ 10 filter in short read lengths.**

| Gene    | 70bp read length | 100bp read length | 150bp read length | 250bp read length |
|---------|------------------|-------------------|-------------------|-------------------|
| ACADM   | LOW DEPTH        | OK                | OK                | OK                |
| ACADS   | LOW DEPTH        | OK                | OK                | OK                |
| ADK     | LOW DEPTH        | LOW DEPTH         | OK                | OK                |
| AK2     | LOW DEPTH        | LOW DEPTH         | LOW DEPTH         | OK                |
| ATM     | LOW DEPTH        | LOW DEPTH         | LOW DEPTH         | OK                |
| BCKDHB  | LOW DEPTH        | LOW DEPTH         | OK                | OK                |
| CBS     | LOW DEPTH        | LOW DEPTH         | LOW DEPTH         | LOW DEPTH         |
| CHD7    | LOW DEPTH        | LOW DEPTH         | OK                | OK                |
| CD247   | LOW DEPTH        | OK                | OK                | OK                |
| CFTR    | LOW DEPTH        | LOW DEPTH         | LOW DEPTH         | LOW DEPTH         |
| CORO1A  | LOW DEPTH        | LOW DEPTH         | LOW DEPTH         | LOW DEPTH         |
| CPS1    | LOW DEPTH        | LOW DEPTH         | OK                | OK                |
| CYP21A2 | LOW DEPTH        | LOW DEPTH         | OK                | OK                |

|          |           |           |           |           |
|----------|-----------|-----------|-----------|-----------|
| DBT      | LOW DEPTH | OK        | OK        | OK        |
| DCLRE1C  | LOW DEPTH | OK        | OK        | OK        |
| DMD      | LOW DEPTH | LOW DEPTH | LOW DEPTH | LOW DEPTH |
| DKC1     | LOW DEPTH | OK        | OK        | OK        |
| DOCK2    | LOW DEPTH | LOW DEPTH | OK        | OK        |
| DOCK8    | LOW DEPTH | LOW DEPTH | LOW DEPTH | OK        |
| EFL1     | LOW DEPTH | LOW DEPTH | LOW DEPTH | LOW DEPTH |
| ETFA     | LOW DEPTH | LOW DEPTH | OK        | OK        |
| ETFB     | LOW DEPTH | OK        | OK        | OK        |
| IKBKB    | LOW DEPTH | OK        | OK        | OK        |
| LMBRD1   | LOW DEPTH | OK        | OK        | OK        |
| LRRC8B   | LOW DEPTH | LOW DEPTH | LOW DEPTH | OK        |
| LRRC8C   | LOW DEPTH | LOW DEPTH | LOW DEPTH | OK        |
| MCCC2    | LOW DEPTH | LOW DEPTH | LOW DEPTH | OK        |
| NADK2    | LOW DEPTH | OK        | OK        | OK        |
| NUDCD3   | LOW DEPTH | OK        | OK        | OK        |
| PAH      | LOW DEPTH | OK        | OK        | OK        |
| PCCA     | LOW DEPTH | LOW DEPTH | OK        | OK        |
| PIK3CD   | LOW DEPTH | OK        | OK        | OK        |
| PRKDC    | LOW DEPTH | OK        | OK        | OK        |
| QDPR     | LOW DEPTH | OK        | OK        | OK        |
| RAG1     | LOW DEPTH | LOW DEPTH | LOW DEPTH | LOW DEPTH |
| SBDS     | LOW DEPTH | OK        | OK        | OK        |
| SLC25A13 | LOW DEPTH | OK        | OK        | OK        |
| SMARCAL1 | LOW DEPTH | LOW DEPTH | OK        | OK        |
| SMN1     | LOW DEPTH | LOW DEPTH | LOW DEPTH | LOW DEPTH |
| SMN2     | LOW DEPTH | LOW DEPTH | LOW DEPTH | LOW DEPTH |
| STAT5B   | LOW DEPTH | LOW DEPTH | LOW DEPTH | OK        |

|         |           |           |    |    |
|---------|-----------|-----------|----|----|
| STIM1   | LOW DEPTH | LOW DEPTH | OK | OK |
| ZNF518A | LOW DEPTH | OK        | OK | OK |

**Supplementary Table 6. Simulated NBS genes with low depth (<20X) exon regions with MQ<sub>≥</sub>10 filter in short read lengths.**

| Gene    | 70bp read length | 100bp read length | 150bp read length | 250bp read length |
|---------|------------------|-------------------|-------------------|-------------------|
| CBS     | LOW DEPTH        | LOW DEPTH         | LOW DEPTH         | LOW DEPTH         |
| CD247   | LOW DEPTH        | OK                | OK                | OK                |
| CORO1A  | LOW DEPTH        | LOW DEPTH         | LOW DEPTH         | LOW DEPTH         |
| CYP21A2 | LOW DEPTH        | LOW DEPTH         | OK                | OK                |
| DKC1    | LOW DEPTH        | OK                | OK                | OK                |
| DOCK8   | LOW DEPTH        | LOW DEPTH         | LOW DEPTH         | OK                |
| ETFA    | LOW DEPTH        | OK                | OK                | OK                |
| SMN1    | LOW DEPTH        | LOW DEPTH         | LOW DEPTH         | LOW DEPTH         |
| SMN2    | LOW DEPTH        | LOW DEPTH         | LOW DEPTH         | LOW DEPTH         |
| STAT5B  | LOW DEPTH        | LOW DEPTH         | LOW DEPTH         | OK                |

**Supplementary Table 7. Low coverage regions with 70bp read lengths**

| Chromosome | Start position | End Position | Gene   |
|------------|----------------|--------------|--------|
| chr1       | 9675191        | 9675198      | PIK3CD |
| chr1       | 9675314        | 9675347      | PIK3CD |
| chr1       | 33051118       | 33051148     | AK2    |
| chr1       | 33051222       | 33051864     | AK2    |
| chr1       | 33052092       | 33052364     | AK2    |
| chr1       | 33052619       | 33052672     | AK2    |
| chr1       | 33052761       | 33052781     | AK2    |
| chr1       | 33053065       | 33053435     | AK2    |
| chr1       | 75782101       | 75782119     | ACADM  |

|       |           |           |         |
|-------|-----------|-----------|---------|
| chr1  | 75782218  | 75782252  | ACADM   |
| chr1  | 75782959  | 75782973  | ACADM   |
| chr1  | 89541491  | 89541671  | LRRRC8B |
| chr1  | 89560563  | 89560885  | LRRRC8B |
| chr1  | 89560939  | 89561834  | LRRRC8B |
| chr1  | 89704842  | 89705173  | LRRRC8C |
| chr1  | 89705239  | 89705260  | LRRRC8C |
| chr1  | 89747094  | 89747973  | LRRRC8C |
| chr1  | 89748051  | 89748099  | LRRRC8C |
| chr1  | 89748203  | 89749887  | LRRRC8C |
| chr1  | 89749962  | 89751920  | LRRRC8C |
| chr1  | 89752008  | 89752033  | LRRRC8C |
| chr1  | 89752126  | 89752614  | LRRRC8C |
| chr1  | 100210327 | 100210346 | DBT     |
| chr1  | 167435134 | 167435177 | CD247   |
| chr10 | 14940525  | 14940560  | DCLRE1C |
| chr10 | 14941707  | 14941771  | DCLRE1C |
| chr10 | 14941839  | 14941892  | DCLRE1C |
| chr10 | 74217666  | 74217698  | ADK     |
| chr10 | 74217765  | 74217975  | ADK     |
| chr10 | 74219032  | 74219081  | ADK     |
| chr10 | 74219143  | 74219185  | ADK     |
| chr10 | 74219245  | 74219311  | ADK     |
| chr10 | 74219362  | 74219421  | ADK     |
| chr10 | 74219488  | 74219508  | ADK     |
| chr10 | 74219612  | 74219846  | ADK     |
| chr10 | 74219914  | 74220003  | ADK     |
| chr10 | 74220088  | 74220106  | ADK     |

|       |          |          |         |
|-------|----------|----------|---------|
| chr10 | 74220339 | 74220562 | ADK     |
| chr10 | 74220943 | 74221416 | ADK     |
| chr10 | 74221502 | 74221529 | ADK     |
| chr10 | 74221598 | 74221877 | ADK     |
| chr10 | 74222196 | 74222526 | ADK     |
| chr10 | 74222626 | 74222651 | ADK     |
| chr10 | 74356059 | 74356262 | ADK     |
| chr10 | 74569323 | 74569368 | ADK     |
| chr10 | 74569884 | 74570163 | ADK     |
| chr10 | 74570518 | 74570555 | ADK     |
| chr10 | 74570641 | 74570686 | ADK     |
| chr10 | 74570783 | 74570804 | ADK     |
| chr10 | 74571143 | 74571427 | ADK     |
| chr10 | 74571696 | 74571711 | ADK     |
| chr10 | 74572017 | 74572187 | ADK     |
| chr10 | 74572259 | 74572288 | ADK     |
| chr10 | 74573076 | 74573140 | ADK     |
| chr10 | 74573227 | 74573237 | ADK     |
| chr10 | 96194832 | 96195006 | ZNF518A |
| chr11 | 3897704  | 3897743  | STIM1   |
| chr11 | 3898154  | 3898319  | STIM1   |
| chr11 | 3898381  | 3898430  | STIM1   |
| chr11 | 3898490  | 3898961  | STIM1   |
| chr11 | 3899153  | 3899202  | STIM1   |
| chr11 | 3899272  | 3899351  | STIM1   |
| chr11 | 3899402  | 3899981  | STIM1   |
| chr11 | 4001013  | 4001046  | STIM1   |
| chr11 | 4001127  | 4001186  | STIM1   |

|       |           |           |       |
|-------|-----------|-----------|-------|
| chr11 | 4001248   | 4001312   | STIM1 |
| chr11 | 4001703   | 4002269   | STIM1 |
| chr11 | 4002490   | 4002770   | STIM1 |
| chr11 | 4002843   | 4002875   | STIM1 |
| chr11 | 4003013   | 4003609   | STIM1 |
| chr11 | 4003800   | 4003830   | STIM1 |
| chr11 | 4004210   | 4004230   | STIM1 |
| chr11 | 4004301   | 4004819   | STIM1 |
| chr11 | 4018225   | 4018407   | STIM1 |
| chr11 | 4033009   | 4033241   | STIM1 |
| chr11 | 36518730  | 36518763  | RAG1  |
| chr11 | 36551764  | 36557494  | RAG1  |
| chr11 | 108261483 | 108261528 | ATM   |
| chr11 | 108261601 | 108261669 | ATM   |
| chr11 | 108261730 | 108261782 | ATM   |
| chr11 | 108262528 | 108262989 | ATM   |
| chr11 | 108263139 | 108263969 | ATM   |
| chr11 | 108264025 | 108264112 | ATM   |
| chr11 | 108264497 | 108265193 | ATM   |
| chr11 | 108265247 | 108265302 | ATM   |
| chr11 | 108265375 | 108265448 | ATM   |
| chr11 | 108265514 | 108265980 | ATM   |
| chr11 | 108266066 | 108266105 | ATM   |
| chr11 | 108357503 | 108357528 | ATM   |
| chr11 | 108357795 | 108357864 | ATM   |
| chr11 | 108357927 | 108357994 | ATM   |
| chr11 | 108358067 | 108358102 | ATM   |
| chr11 | 108358166 | 108358559 | ATM   |

|       |           |           |       |
|-------|-----------|-----------|-------|
| chr11 | 108358617 | 108358680 | ATM   |
| chr11 | 108358998 | 108359368 | ATM   |
| chr11 | 108359428 | 108359476 | ATM   |
| chr11 | 108359939 | 108360569 | ATM   |
| chr11 | 108360660 | 108361421 | ATM   |
| chr11 | 108361490 | 108361557 | ATM   |
| chr11 | 108361847 | 108362416 | ATM   |
| chr11 | 108362479 | 108362767 | ATM   |
| chr12 | 102859432 | 102859464 | PAH   |
| chr12 | 102859583 | 102859592 | PAH   |
| chr12 | 102899636 | 102899827 | PAH   |
| chr12 | 120731697 | 120731896 | ACADS |
| chr13 | 100264022 | 100264091 | PCCA  |
| chr13 | 100283776 | 100283821 | PCCA  |
| chr13 | 100319022 | 100319051 | PCCA  |
| chr13 | 100319137 | 100319537 | PCCA  |
| chr13 | 100320281 | 100320319 | PCCA  |
| chr13 | 100320411 | 100320476 | PCCA  |
| chr13 | 100320554 | 100320606 | PCCA  |
| chr15 | 76230277  | 76230439  | ETFA  |
| chr15 | 76257497  | 76257825  | ETFA  |
| chr15 | 82170245  | 82170297  | EFL1  |
| chr15 | 82193503  | 82193532  | EFL1  |
| chr15 | 82193609  | 82193899  | EFL1  |
| chr15 | 82201738  | 82202008  | EFL1  |
| chr15 | 82214678  | 82214684  | EFL1  |
| chr15 | 82220519  | 82220535  | EFL1  |
| chr15 | 82220645  | 82220672  | EFL1  |



|       |           |           |          |
|-------|-----------|-----------|----------|
| chr15 | 82234578  | 82234636  | EFL1     |
| chr15 | 82242292  | 82243781  | EFL1     |
| chr15 | 82250093  | 82250593  | EFL1     |
| chr16 | 30188651  | 30189075  | CORO1A   |
| chr17 | 42218722  | 42218732  | STAT5B   |
| chr17 | 42218823  | 42218886  | STAT5B   |
| chr17 | 42219301  | 42219765  | STAT5B   |
| chr17 | 42221019  | 42221069  | STAT5B   |
| chr17 | 42264352  | 42264392  | STAT5B   |
| chr17 | 42264495  | 42264519  | STAT5B   |
| chr17 | 42264658  | 42265185  | STAT5B   |
| chr19 | 51353495  | 51353560  | ETFB     |
| chr2  | 210507485 | 210507755 | CPS1     |
| chr2  | 210507833 | 210507857 | CPS1     |
| chr2  | 210508161 | 210508219 | CPS1     |
| chr2  | 210508283 | 210508477 | CPS1     |
| chr2  | 210508532 | 210508538 | CPS1     |
| chr2  | 210509164 | 210509191 | CPS1     |
| chr2  | 210509292 | 210509320 | CPS1     |
| chr2  | 210509394 | 210509433 | CPS1     |
| chr2  | 210510280 | 210510310 | CPS1     |
| chr2  | 210510783 | 210510821 | CPS1     |
| chr2  | 210639384 | 210639584 | CPS1     |
| chr2  | 210665804 | 210665887 | CPS1     |
| chr2  | 210665941 | 210666023 | CPS1     |
| chr2  | 210666074 | 210666503 | CPS1     |
| chr2  | 216458846 | 216458906 | SMARCAL1 |
| chr2  | 216458965 | 216459023 | SMARCAL1 |

|       |           |           |          |
|-------|-----------|-----------|----------|
| chr2  | 216459564 | 216459885 | SMARCAL1 |
| chr2  | 216460637 | 216460668 | SMARCAL1 |
| chr21 | 43053191  | 43055733  | CBS      |
| chr21 | 43055798  | 43056614  | CBS      |
| chr21 | 43056680  | 43057288  | CBS      |
| chr21 | 43057362  | 43057400  | CBS      |
| chr21 | 43057473  | 43059973  | CBS      |
| chr21 | 43060035  | 43061748  | CBS      |
| chr21 | 43061813  | 43063630  | CBS      |
| chr21 | 43063694  | 43065208  | CBS      |
| chr21 | 43065271  | 43066102  | CBS      |
| chr21 | 43066271  | 43066797  | CBS      |
| chr21 | 43067042  | 43067309  | CBS      |
| chr21 | 43067376  | 43067747  | CBS      |
| chr21 | 43067826  | 43067878  | CBS      |
| chr21 | 43067957  | 43068250  | CBS      |
| chr21 | 43068317  | 43068607  | CBS      |
| chr21 | 43068768  | 43070072  | CBS      |
| chr21 | 43070136  | 43075920  | CBS      |
| chr21 | 43075983  | 43076798  | CBS      |
| chr21 | 43076863  | 43076937  | CBS      |
| chr4  | 17469874  | 17469878  | QDPR     |
| chr5  | 36234156  | 36234335  | NADK2    |
| chr5  | 70049612  | 70052171  | SMN2     |
| chr5  | 70052223  | 70060226  | SMN2     |
| chr5  | 70060291  | 70068348  | SMN2     |
| chr5  | 70068400  | 70068746  | SMN2     |
| chr5  | 70068811  | 70071150  | SMN2     |

|      |          |          |      |
|------|----------|----------|------|
| chr5 | 70071214 | 70072857 | SMN2 |
| chr5 | 70072922 | 70074592 | SMN2 |
| chr5 | 70074667 | 70074722 | SMN2 |
| chr5 | 70074814 | 70074861 | SMN2 |
| chr5 | 70074973 | 70075011 | SMN2 |
| chr5 | 70075101 | 70075484 | SMN2 |
| chr5 | 70075737 | 70075762 | SMN2 |
| chr5 | 70075851 | 70075907 | SMN2 |
| chr5 | 70076104 | 70076416 | SMN2 |
| chr5 | 70076707 | 70076756 | SMN2 |
| chr5 | 70076826 | 70077222 | SMN2 |
| chr5 | 70077286 | 70077775 | SMN2 |
| chr5 | 70077899 | 70078521 | SMN2 |
| chr5 | 70925030 | 70935648 | SMN1 |
| chr5 | 70935715 | 70944169 | SMN1 |
| chr5 | 70944236 | 70946576 | SMN1 |
| chr5 | 70946639 | 70947121 | SMN1 |
| chr5 | 70947181 | 70948283 | SMN1 |
| chr5 | 70948348 | 70950016 | SMN1 |
| chr5 | 70950091 | 70950144 | SMN1 |
| chr5 | 70950240 | 70950284 | SMN1 |
| chr5 | 70950397 | 70950436 | SMN1 |
| chr5 | 70950525 | 70950910 | SMN1 |
| chr5 | 70951153 | 70951211 | SMN1 |
| chr5 | 70951278 | 70951327 | SMN1 |
| chr5 | 70951525 | 70951839 | SMN1 |
| chr5 | 70952125 | 70952175 | SMN1 |
| chr5 | 70952245 | 70952641 | SMN1 |

|      |           |           |         |
|------|-----------|-----------|---------|
| chr5 | 70952704  | 70953195  | SMN1    |
| chr5 | 70953317  | 70953941  | SMN1    |
| chr5 | 71604761  | 71605082  | MCCC2   |
| chr5 | 71605140  | 71605190  | MCCC2   |
| chr5 | 71605269  | 71605299  | MCCC2   |
| chr5 | 71605381  | 71605684  | MCCC2   |
| chr5 | 71606118  | 71606342  | MCCC2   |
| chr5 | 71606410  | 71607275  | MCCC2   |
| chr5 | 71607343  | 71607711  | MCCC2   |
| chr5 | 71607876  | 71608578  | MCCC2   |
| chr5 | 71608978  | 71609328  | MCCC2   |
| chr5 | 71609386  | 71609460  | MCCC2   |
| chr5 | 71609526  | 71609573  | MCCC2   |
| chr5 | 71609647  | 71609686  | MCCC2   |
| chr5 | 71609751  | 71609912  | MCCC2   |
| chr5 | 169665002 | 169665320 | DOCK2   |
| chr5 | 169821385 | 169821386 | DOCK2   |
| chr5 | 169821491 | 169821520 | DOCK2   |
| chr5 | 169823930 | 169823977 | DOCK2   |
| chr5 | 169824047 | 169824114 | DOCK2   |
| chr5 | 169824194 | 169824232 | DOCK2   |
| chr5 | 169825023 | 169825057 | DOCK2   |
| chr5 | 169825125 | 169825173 | DOCK2   |
| chr5 | 169834316 | 169834549 | DOCK2   |
| chr5 | 169997265 | 169997609 | DOCK2   |
| chr5 | 170004545 | 170004850 | DOCK2   |
| chr5 | 170004920 | 170004943 | DOCK2   |
| chr6 | 32038560  | 32038775  | CYP21A2 |

|      |          |          |         |
|------|----------|----------|---------|
| chr6 | 32039210 | 32039225 | CYP21A2 |
| chr6 | 32039316 | 32039384 | CYP21A2 |
| chr6 | 32039482 | 32039495 | CYP21A2 |
| chr6 | 32039584 | 32039632 | CYP21A2 |
| chr6 | 32039730 | 32039744 | CYP21A2 |
| chr6 | 32040453 | 32040504 | CYP21A2 |
| chr6 | 32040573 | 32040635 | CYP21A2 |
| chr6 | 32040697 | 32040766 | CYP21A2 |
| chr6 | 32040827 | 32041085 | CYP21A2 |
| chr6 | 32041161 | 32041430 | CYP21A2 |
| chr6 | 69745327 | 69745497 | LMBRD1  |
| chr6 | 69749903 | 69749955 | LMBRD1  |
| chr6 | 69750018 | 69750075 | LMBRD1  |
| chr6 | 80138798 | 80138877 | BCKDHB  |
| chr6 | 80138939 | 80138974 | BCKDHB  |
| chr6 | 80139273 | 80139365 | BCKDHB  |
| chr6 | 80139428 | 80139766 | BCKDHB  |
| chr6 | 80139848 | 80139891 | BCKDHB  |
| chr6 | 80140532 | 80140567 | BCKDHB  |
| chr6 | 80140631 | 80140678 | BCKDHB  |
| chr6 | 80140736 | 80140789 | BCKDHB  |
| chr6 | 80140862 | 80140916 | BCKDHB  |
| chr6 | 80148999 | 80149039 | BCKDHB  |
| chr6 | 80149144 | 80149177 | BCKDHB  |
| chr6 | 80149561 | 80149766 | BCKDHB  |
| chr6 | 80230091 | 80230270 | BCKDHB  |
| chr6 | 80239797 | 80239849 | BCKDHB  |
| chr7 | 44426667 | 44426684 | NUDCD3  |

|      |           |           |          |
|------|-----------|-----------|----------|
| chr7 | 44455836  | 44455869  | NUDCD3   |
| chr7 | 44455965  | 44455983  | NUDCD3   |
| chr7 | 66989792  | 66989852  | SBDS     |
| chr7 | 96140008  | 96140194  | SLC25A13 |
| chr7 | 96274545  | 96274567  | SLC25A13 |
| chr7 | 96274663  | 96274704  | SLC25A13 |
| chr7 | 96275382  | 96275415  | SLC25A13 |
| chr7 | 117525296 | 117525990 | CFTR     |
| chr7 | 117526053 | 117526124 | CFTR     |
| chr7 | 117526185 | 117529464 | CFTR     |
| chr7 | 117556574 | 117556759 | CFTR     |
| chr7 | 117610053 | 117610335 | CFTR     |
| chr8 | 42327870  | 42328055  | IKBKB    |
| chr8 | 47800152  | 47800169  | PRKDC    |
| chr8 | 47800239  | 47800340  | PRKDC    |
| chr8 | 47800403  | 47800448  | PRKDC    |
| chr8 | 47834749  | 47834793  | PRKDC    |
| chr8 | 47834871  | 47834907  | PRKDC    |
| chr8 | 47955242  | 47955431  | PRKDC    |
| chr8 | 60760308  | 60760788  | CHD7     |
| chr8 | 60761116  | 60761354  | CHD7     |
| chr9 | 230486    | 230513    | DOCK8    |
| chr9 | 230586    | 230678    | DOCK8    |
| chr9 | 230853    | 230890    | DOCK8    |
| chr9 | 230952    | 231171    | DOCK8    |
| chr9 | 231260    | 231287    | DOCK8    |
| chr9 | 231396    | 231412    | DOCK8    |
| chr9 | 231507    | 231563    | DOCK8    |

|      |          |          |       |
|------|----------|----------|-------|
| chr9 | 232238   | 232280   | DOCK8 |
| chr9 | 233024   | 233272   | DOCK8 |
| chr9 | 233340   | 233395   | DOCK8 |
| chr9 | 233472   | 233525   | DOCK8 |
| chr9 | 233585   | 233863   | DOCK8 |
| chr9 | 320302   | 322414   | DOCK8 |
| chr9 | 380100   | 380481   | DOCK8 |
| chr9 | 380542   | 380823   | DOCK8 |
| chrX | 31184410 | 31184876 | DMD   |
| chrX | 31184957 | 31184973 | DMD   |
| chrX | 31227724 | 31227787 | DMD   |
| chrX | 31227848 | 31228099 | DMD   |
| chrX | 31372724 | 31372726 | DMD   |
| chrX | 31372824 | 31372897 | DMD   |
| chrX | 31372976 | 31373014 | DMD   |
| chrX | 31373076 | 31373387 | DMD   |
| chrX | 31373480 | 31373511 | DMD   |
| chrX | 31373828 | 31373867 | DMD   |
| chrX | 31373937 | 31374338 | DMD   |
| chrX | 31374610 | 31374674 | DMD   |
| chrX | 31511721 | 31512620 | DMD   |
| chrX | 31512866 | 31512883 | DMD   |
| chrX | 31512968 | 31513354 | DMD   |
| chrX | 31530718 | 31531663 | DMD   |
| chrX | 31531783 | 31532171 | DMD   |
| chrX | 31532248 | 31535577 | DMD   |
| chrX | 31559424 | 31559462 | DMD   |
| chrX | 31559553 | 31559580 | DMD   |

|      |          |          |     |
|------|----------|----------|-----|
| chrX | 31688746 | 31688758 | DMD |
| chrX | 31689458 | 31689485 | DMD |
| chrX | 31689575 | 31689631 | DMD |
| chrX | 31689735 | 31689740 | DMD |
| chrX | 31690302 | 31690362 | DMD |
| chrX | 31690426 | 31690481 | DMD |
| chrX | 31715323 | 31715503 | DMD |
| chrX | 31749299 | 31749342 | DMD |
| chrX | 31749410 | 31749562 | DMD |
| chrX | 31749625 | 31749962 | DMD |
| chrX | 31750124 | 31750132 | DMD |
| chrX | 31750185 | 31750422 | DMD |
| chrX | 31750619 | 31751132 | DMD |
| chrX | 31897398 | 31897875 | DMD |
| chrX | 31898104 | 31898117 | DMD |
| chrX | 31898203 | 31898528 | DMD |
| chrX | 32244357 | 32244660 | DMD |
| chrX | 32244831 | 32245188 | DMD |
| chrX | 32245282 | 32246695 | DMD |
| chrX | 32400081 | 32400127 | DMD |
| chrX | 32400615 | 32400907 | DMD |
| chrX | 32405902 | 32405962 | DMD |
| chrX | 32406021 | 32406070 | DMD |
| chrX | 32407455 | 32407522 | DMD |
| chrX | 32407629 | 32407632 | DMD |
| chrX | 32486604 | 32486925 | DMD |
| chrX | 32654200 | 32654234 | DMD |
| chrX | 32732231 | 32732297 | DMD |



|      |           |           |      |
|------|-----------|-----------|------|
| chrX | 32732357  | 32732404  | DMD  |
| chrX | 32732727  | 32732768  | DMD  |
| chrX | 32733134  | 32733180  | DMD  |
| chrX | 32733271  | 32733321  | DMD  |
| chrX | 32733715  | 32734156  | DMD  |
| chrX | 32734213  | 32734288  | DMD  |
| chrX | 32734345  | 32734851  | DMD  |
| chrX | 32735171  | 32735198  | DMD  |
| chrX | 32735269  | 32735319  | DMD  |
| chrX | 33118178  | 33118221  | DMD  |
| chrX | 33118300  | 33118352  | DMD  |
| chrX | 33190536  | 33190673  | DMD  |
| chrX | 33304294  | 33304348  | DMD  |
| chrX | 33304407  | 33305253  | DMD  |
| chrX | 154768767 | 154768956 | DKC1 |
| chrX | 154773406 | 154773447 | DKC1 |
| chrX | 154773508 | 154773617 | DKC1 |

**Supplementary Table 8. Low coverage regions with 100bp read lengths**

| Chromosome | Start position | End position | Gene    |
|------------|----------------|--------------|---------|
| chr1       | 33051235       | 33051790     | AK2     |
| chr1       | 33052124       | 33052151     | AK2     |
| chr1       | 33052274       | 33052307     | AK2     |
| chr1       | 33053105       | 33053410     | AK2     |
| chr1       | 89561160       | 89561173     | LRRRC8B |
| chr1       | 89561295       | 89561773     | LRRRC8B |
| chr1       | 89747218       | 89747733     | LRRRC8C |
| chr1       | 89747867       | 89747871     | LRRRC8C |

|       |           |           |       |
|-------|-----------|-----------|-------|
| chr1  | 89748223  | 89749528  | LRR8C |
| chr1  | 89749980  | 89750861  | LRR8C |
| chr1  | 89751097  | 89751882  | LRR8C |
| chr1  | 89752172  | 89752582  | LRR8C |
| chr10 | 74221093  | 74221185  | ADK   |
| chr10 | 74221668  | 74221683  | ADK   |
| chr11 | 3898574   | 3898595   | STIM1 |
| chr11 | 3898706   | 3898792   | STIM1 |
| chr11 | 3899540   | 3899594   | STIM1 |
| chr11 | 4001731   | 4001763   | STIM1 |
| chr11 | 4001853   | 4001971   | STIM1 |
| chr11 | 4002028   | 4002120   | STIM1 |
| chr11 | 4003065   | 4003334   | STIM1 |
| chr11 | 4003394   | 4003454   | STIM1 |
| chr11 | 4004436   | 4004718   | STIM1 |
| chr11 | 36551894  | 36554098  | RAG1  |
| chr11 | 36554200  | 36557452  | RAG1  |
| chr11 | 108262657 | 108262915 | ATM   |
| chr11 | 108263293 | 108263415 | ATM   |
| chr11 | 108263469 | 108263597 | ATM   |
| chr11 | 108263654 | 108263756 | ATM   |
| chr11 | 108263861 | 108263927 | ATM   |
| chr11 | 108264044 | 108264082 | ATM   |
| chr11 | 108264601 | 108265093 | ATM   |
| chr11 | 108265531 | 108265930 | ATM   |
| chr11 | 108358354 | 108358380 | ATM   |
| chr11 | 108358515 | 108358551 | ATM   |
| chr11 | 108359092 | 108359147 | ATM   |

|       |           |           |          |
|-------|-----------|-----------|----------|
| chr11 | 108359226 | 108359259 | ATM      |
| chr11 | 108360366 | 108360387 | ATM      |
| chr11 | 108360732 | 108360733 | ATM      |
| chr11 | 108360849 | 108360955 | ATM      |
| chr11 | 108361019 | 108361374 | ATM      |
| chr11 | 108361909 | 108362253 | ATM      |
| chr11 | 108362503 | 108362542 | ATM      |
| chr13 | 100319338 | 100319362 | PCCA     |
| chr15 | 76257628  | 76257681  | ETFA     |
| chr15 | 82242324  | 82243758  | EFL1     |
| chr15 | 82250121  | 82250561  | EFL1     |
| chr16 | 30188630  | 30189075  | CORO1A   |
| chr17 | 42219350  | 42219735  | STAT5B   |
| chr17 | 42264717  | 42265112  | STAT5B   |
| chr2  | 210507693 | 210507698 | CPS1     |
| chr2  | 210666224 | 210666326 | CPS1     |
| chr2  | 210666386 | 210666475 | CPS1     |
| chr2  | 216459640 | 216459661 | SMARCAL1 |
| chr21 | 43053191  | 43055720  | CBS      |
| chr21 | 43055816  | 43056597  | CBS      |
| chr21 | 43056696  | 43057237  | CBS      |
| chr21 | 43057517  | 43059956  | CBS      |
| chr21 | 43060053  | 43061733  | CBS      |
| chr21 | 43061830  | 43063613  | CBS      |
| chr21 | 43063711  | 43065194  | CBS      |
| chr21 | 43065289  | 43066071  | CBS      |
| chr21 | 43066303  | 43066769  | CBS      |
| chr21 | 43067219  | 43067294  | CBS      |

|       |          |          |      |
|-------|----------|----------|------|
| chr21 | 43067393 | 43067728 | CBS  |
| chr21 | 43067976 | 43068059 | CBS  |
| chr21 | 43068149 | 43068238 | CBS  |
| chr21 | 43068332 | 43068424 | CBS  |
| chr21 | 43068532 | 43068563 | CBS  |
| chr21 | 43068812 | 43070057 | CBS  |
| chr21 | 43070151 | 43070898 | CBS  |
| chr21 | 43070969 | 43075908 | CBS  |
| chr21 | 43075999 | 43076781 | CBS  |
| chr5  | 70049612 | 70052156 | SMN2 |
| chr5  | 70052237 | 70052856 | SMN2 |
| chr5  | 70052927 | 70060210 | SMN2 |
| chr5  | 70060310 | 70068335 | SMN2 |
| chr5  | 70068411 | 70068730 | SMN2 |
| chr5  | 70068820 | 70070126 | SMN2 |
| chr5  | 70070195 | 70071135 | SMN2 |
| chr5  | 70071233 | 70072838 | SMN2 |
| chr5  | 70072936 | 70074566 | SMN2 |
| chr5  | 70075118 | 70075447 | SMN2 |
| chr5  | 70076188 | 70076385 | SMN2 |
| chr5  | 70076862 | 70077204 | SMN2 |
| chr5  | 70077303 | 70077750 | SMN2 |
| chr5  | 70077928 | 70078521 | SMN2 |
| chr5  | 70925030 | 70927577 | SMN1 |
| chr5  | 70927655 | 70928273 | SMN1 |
| chr5  | 70928353 | 70935634 | SMN1 |
| chr5  | 70935729 | 70943759 | SMN1 |
| chr5  | 70943835 | 70944153 | SMN1 |

|      |           |           |         |
|------|-----------|-----------|---------|
| chr5 | 70944253  | 70945554  | SMN1    |
| chr5 | 70945617  | 70946562  | SMN1    |
| chr5 | 70946654  | 70947101  | SMN1    |
| chr5 | 70947201  | 70948266  | SMN1    |
| chr5 | 70948365  | 70949990  | SMN1    |
| chr5 | 70950541  | 70950873  | SMN1    |
| chr5 | 70951553  | 70951808  | SMN1    |
| chr5 | 70952284  | 70952620  | SMN1    |
| chr5 | 70952727  | 70953164  | SMN1    |
| chr5 | 70953349  | 70953941  | SMN1    |
| chr5 | 71604774  | 71605054  | MCCC2   |
| chr5 | 71606480  | 71606943  | MCCC2   |
| chr5 | 71607012  | 71607065  | MCCC2   |
| chr5 | 71607203  | 71607232  | MCCC2   |
| chr5 | 71607357  | 71607433  | MCCC2   |
| chr5 | 71607496  | 71607571  | MCCC2   |
| chr5 | 71607990  | 71608552  | MCCC2   |
| chr5 | 169665021 | 169665300 | DOCK2   |
| chr5 | 169997471 | 169997484 | DOCK2   |
| chr5 | 170004583 | 170004608 | DOCK2   |
| chr5 | 170004717 | 170004810 | DOCK2   |
| chr6 | 32040842  | 32040909  | CYP21A2 |
| chr6 | 32041006  | 32041067  | CYP21A2 |
| chr6 | 32041177  | 32041266  | CYP21A2 |
| chr6 | 32041374  | 32041407  | CYP21A2 |
| chr6 | 80139299  | 80139336  | BCKDHB  |
| chr7 | 117525323 | 117525835 | CFTR    |
| chr7 | 117525893 | 117525969 | CFTR    |

|      |           |           |       |
|------|-----------|-----------|-------|
| chr7 | 117526313 | 117527972 | CFTR  |
| chr7 | 117528086 | 117529193 | CFTR  |
| chr7 | 117529249 | 117529351 | CFTR  |
| chr8 | 60760339  | 60760736  | CHD7  |
| chr9 | 320318    | 322382    | DOCK8 |
| chr9 | 380120    | 380468    | DOCK8 |
| chr9 | 380557    | 380659    | DOCK8 |
| chr9 | 380766    | 380791    | DOCK8 |
| chrX | 31184445  | 31184720  | DMD   |
| chrX | 31228017  | 31228067  | DMD   |
| chrX | 31511828  | 31511947  | DMD   |
| chrX | 31512285  | 31512593  | DMD   |
| chrX | 31513009  | 31513017  | DMD   |
| chrX | 31513096  | 31513232  | DMD   |
| chrX | 31513301  | 31513326  | DMD   |
| chrX | 31530748  | 31530750  | DMD   |
| chrX | 31530867  | 31531551  | DMD   |
| chrX | 31531823  | 31532110  | DMD   |
| chrX | 31532311  | 31535547  | DMD   |
| chrX | 31749645  | 31749725  | DMD   |
| chrX | 31750231  | 31750265  | DMD   |
| chrX | 31750752  | 31750806  | DMD   |
| chrX | 31897426  | 31897773  | DMD   |
| chrX | 31898232  | 31898266  | DMD   |
| chrX | 32244412  | 32244569  | DMD   |
| chrX | 32244970  | 32245030  | DMD   |
| chrX | 32245434  | 32245899  | DMD   |
| chrX | 32245993  | 32246079  | DMD   |

|      |          |          |     |
|------|----------|----------|-----|
| chrX | 32246172 | 32246282 | DMD |
| chrX | 32246353 | 32246693 | DMD |
| chrX | 32486651 | 32486669 | DMD |
| chrX | 32486803 | 32486826 | DMD |
| chrX | 32733774 | 32733805 | DMD |
| chrX | 32733900 | 32733996 | DMD |
| chrX | 32734080 | 32734127 | DMD |
| chrX | 33304619 | 33304927 | DMD |
| chrX | 33305004 | 33305072 | DMD |

**Supplementary Table 9. Low coverage regions with 150bp read lengths**

| Chromosome | Start position | End position | Gene  |
|------------|----------------|--------------|-------|
| chr1       | 33051288       | 33051774     | AK2   |
| chr1       | 89561538       | 89561589     | LRR8B |
| chr1       | 89748321       | 89748327     | LRR8C |
| chr1       | 89748379       | 89748654     | LRR8C |
| chr1       | 89748994       | 89749358     | LRR8C |
| chr1       | 89750291       | 89750414     | LRR8C |
| chr1       | 89750530       | 89750655     | LRR8C |
| chr1       | 89751244       | 89751248     | LRR8C |
| chr1       | 89751419       | 89751490     | LRR8C |
| chr1       | 89752300       | 89752308     | LRR8C |
| chr11      | 36551972       | 36552587     | RAG1  |
| chr11      | 36552746       | 36552840     | RAG1  |
| chr11      | 36552911       | 36553101     | RAG1  |
| chr11      | 36553160       | 36553298     | RAG1  |
| chr11      | 36553386       | 36554081     | RAG1  |

|       |           |           |        |
|-------|-----------|-----------|--------|
| chr11 | 36554244  | 36557389  | RAG1   |
| chr11 | 108264767 | 108264917 | ATM    |
| chr15 | 82242400  | 82243674  | EFL1   |
| chr15 | 82250202  | 82250516  | EFL1   |
| chr16 | 30188728  | 30189075  | CORO1A |
| chr17 | 42219412  | 42219691  | STAT5B |
| chr17 | 42264911  | 42264924  | STAT5B |
| chr21 | 43053191  | 43055676  | CBS    |
| chr21 | 43055856  | 43056562  | CBS    |
| chr21 | 43056737  | 43057192  | CBS    |
| chr21 | 43057577  | 43059913  | CBS    |
| chr21 | 43060101  | 43061691  | CBS    |
| chr21 | 43061880  | 43063564  | CBS    |
| chr21 | 43063746  | 43065148  | CBS    |
| chr21 | 43065328  | 43066021  | CBS    |
| chr21 | 43066359  | 43066711  | CBS    |
| chr21 | 43067433  | 43067447  | CBS    |
| chr21 | 43068858  | 43070013  | CBS    |
| chr21 | 43070192  | 43070869  | CBS    |
| chr21 | 43070991  | 43075864  | CBS    |
| chr21 | 43076037  | 43076740  | CBS    |
| chr5  | 70049612  | 70052130  | SMN2   |
| chr5  | 70052263  | 70052828  | SMN2   |
| chr5  | 70052955  | 70060170  | SMN2   |
| chr5  | 70060351  | 70068306  | SMN2   |
| chr5  | 70068871  | 70070101  | SMN2   |
| chr5  | 70070219  | 70071084  | SMN2   |
| chr5  | 70071281  | 70071380  | SMN2   |



|      |           |           |       |
|------|-----------|-----------|-------|
| chr5 | 70071518  | 70071632  | SMN2  |
| chr5 | 70071820  | 70072794  | SMN2  |
| chr5 | 70072984  | 70074483  | SMN2  |
| chr5 | 70077095  | 70077166  | SMN2  |
| chr5 | 70077345  | 70077707  | SMN2  |
| chr5 | 70077980  | 70078521  | SMN2  |
| chr5 | 70925030  | 70927548  | SMN1  |
| chr5 | 70927685  | 70928247  | SMN1  |
| chr5 | 70928380  | 70935584  | SMN1  |
| chr5 | 70935779  | 70943732  | SMN1  |
| chr5 | 70944292  | 70945533  | SMN1  |
| chr5 | 70945642  | 70946517  | SMN1  |
| chr5 | 70946696  | 70947062  | SMN1  |
| chr5 | 70947237  | 70948221  | SMN1  |
| chr5 | 70948407  | 70949916  | SMN1  |
| chr5 | 70952508  | 70952589  | SMN1  |
| chr5 | 70952758  | 70953111  | SMN1  |
| chr5 | 70953392  | 70953941  | SMN1  |
| chr5 | 71606720  | 71606807  | MCCC2 |
| chr7 | 117525373 | 117525771 | CFTR  |
| chr7 | 117526396 | 117527914 | CFTR  |
| chr7 | 117528753 | 117528960 | CFTR  |
| chr7 | 117529021 | 117529053 | CFTR  |
| chr9 | 320544    | 320643    | DOCK8 |
| chr9 | 320835    | 322329    | DOCK8 |
| chr9 | 380340    | 380424    | DOCK8 |
| chrX | 31532381  | 31533101  | DMD   |
| chrX | 31533170  | 31533960  | DMD   |

|      |          |          |     |
|------|----------|----------|-----|
| chrX | 31534050 | 31534726 | DMD |
| chrX | 31534862 | 31534943 | DMD |
| chrX | 31535064 | 31535496 | DMD |
| chrX | 32246452 | 32246465 | DMD |

**Supplementary Table 10. Low coverage regions with 250bp read lengths**

| Chromosome | Start position | End position | Gene   |
|------------|----------------|--------------|--------|
| chr11      | 36552099       | 36552121     | RAG1   |
| chr11      | 36552380       | 36552483     | RAG1   |
| chr11      | 36553558       | 36553604     | RAG1   |
| chr11      | 36553852       | 36553908     | RAG1   |
| chr11      | 36554638       | 36554863     | RAG1   |
| chr11      | 36555074       | 36556734     | RAG1   |
| chr15      | 82242502       | 82243616     | EFL1   |
| chr16      | 30188845       | 30189075     | CORO1A |
| chr21      | 43053191       | 43055584     | CBS    |
| chr21      | 43055963       | 43056462     | CBS    |
| chr21      | 43057672       | 43059824     | CBS    |
| chr21      | 43060178       | 43061608     | CBS    |
| chr21      | 43061958       | 43063469     | CBS    |
| chr21      | 43063843       | 43065040     | CBS    |
| chr21      | 43065420       | 43065920     | CBS    |
| chr21      | 43069035       | 43069932     | CBS    |
| chr21      | 43070289       | 43070780     | CBS    |
| chr21      | 43071089       | 43075755     | CBS    |
| chr21      | 43076150       | 43076614     | CBS    |
| chr5       | 70049612       | 70052041     | SMN2   |
| chr5       | 70053041       | 70060083     | SMN2   |
| chr5       | 70060453       | 70068209     | SMN2   |
| chr5       | 70068965       | 70070008     | SMN2   |
| chr5       | 70070307       | 70070991     | SMN2   |

|      |           |           |      |
|------|-----------|-----------|------|
| chr5 | 70071901  | 70072684  | SMN2 |
| chr5 | 70073092  | 70074393  | SMN2 |
| chr5 | 70078088  | 70078521  | SMN2 |
| chr5 | 70925030  | 70927450  | SMN1 |
| chr5 | 70928487  | 70935489  | SMN1 |
| chr5 | 70935862  | 70943624  | SMN1 |
| chr5 | 70944391  | 70945440  | SMN1 |
| chr5 | 70945737  | 70946415  | SMN1 |
| chr5 | 70947330  | 70948132  | SMN1 |
| chr5 | 70948492  | 70949805  | SMN1 |
| chr5 | 70953493  | 70953941  | SMN1 |
| chr7 | 117526584 | 117527750 | CFTR |
| chrX | 31532471  | 31532957  | DMD  |
| chrX | 31533301  | 31533780  | DMD  |

**Supplementary Table 11. Variant calling results for simulated homozygous pathogenic variants on CYP21A2 with MQ $\geq$ 20 filter.**

| Variant | Position      | REF | ALT | Called Position | Called REF | Called ALT | GT      |
|---------|---------------|-----|-----|-----------------|------------|------------|---------|
| 1       | chr6:32039081 | C   | G   | 32039081        | C          | G          | 1/1     |
| 2       | chr6:32038514 | C   | T   | 32038514        | C          | T          | 1/1     |
| 3       | chr6:32039162 | A   | C   | 32039162        | A          | C          | 1/1     |
| 4       | chr6:32039426 | T   | A   | 32039426        | T          | A          | 1/1     |
| 5       | chr6:32040110 | G   | C   | 32040110        | G          | C          | 1/1     |
| 6       | chr6:32040110 | G   | T   | 32040110        | G          | T          | 1/1     |
| 7       | chr6:32040140 | G   | A   | 32040140        | G          | A          | 1/1     |
| 8       | chr6:32040421 | C   | T   | 32040421        | C          | T          | 1/1     |
| 9       | chr6:32040535 | C   | T   | No Call         | No Call    | No Call    | No Call |
| 10      | chr6:32040766 | G   | A   | 32040766        | G          | A          | 1/1     |
| 11      | chr6:32041006 | C   | T   | 32041006        | C          | T          | 1/1     |

**Supplementary Table 12. Variant calling results for simulated heterozygous pathogenic variants on CYP21A2 with MQ  $\geq$  20 filter.**

| Variant | Position      | REF | ALT | Called Position | Called REF | Called ALT | GT      |
|---------|---------------|-----|-----|-----------------|------------|------------|---------|
| 1       | chr6:32039081 | C   | G   | 32039081        | C          | G          | 0/1     |
| 2       | chr6:32038514 | C   | T   | 32038514        | C          | T          | 0/1     |
| 3       | chr6:32039162 | A   | C   | 32039162        | A          | C          | 0/1     |
| 4       | chr6:32039426 | T   | A   | 32039426        | T          | A          | 0/1     |
| 5       | chr6:32040110 | G   | C   | 32040110        | G          | C          | 0/1     |
| 6       | chr6:32040110 | G   | T   | 32040110        | G          | T          | 0/1     |
| 7       | chr6:32040140 | G   | A   | 32040140        | G          | A          | 0/1     |
| 8       | chr6:32040421 | C   | T   | 32040421        | C          | T          | 0/1     |
| 9       | chr6:32040535 | C   | T   | 32040535        | No call    | No call    | No call |
| 10      | chr6:32040766 | G   | A   | 32040766        | G          | A          | 0/1     |
| 11      | chr6:32041006 | C   | T   | 32041006        | C          | T          | 0/1     |

**Supplementary Table 13. Variant calling results for simulated homozygous pathogenic variants on CYP21A2 with MQ  $\geq$  10 filter.**

| Variant | Position      | REF | ALT | Called Position | Called REF | Called ALT | GT      |
|---------|---------------|-----|-----|-----------------|------------|------------|---------|
| 1       | chr6:32039081 | C   | G   | 32039081        | C          | G          | 1/1     |
| 2       | chr6:32038514 | C   | T   | 32038514        | C          | T          | 1/1     |
| 3       | chr6:32039162 | A   | C   | 32039162        | A          | C          | 1/1     |
| 4       | chr6:32039426 | T   | A   | 32039426        | T          | A          | 1/1     |
| 5       | chr6:32040110 | G   | C   | 32040110        | G          | C          | 1/1     |
| 6       | chr6:32040110 | G   | T   | 32040110        | G          | T          | 1/1     |
| 7       | chr6:32040140 | G   | A   | 32040140        | G          | A          | 1/1     |
| 8       | chr6:32040421 | C   | T   | 32040421        | C          | T          | 1/1     |
| 9       | chr6:32040535 | C   | T   | No Call         | No Call    | No Call    | No Call |

|    |               |   |   |          |   |   |     |
|----|---------------|---|---|----------|---|---|-----|
| 10 | chr6:32040766 | G | A | 32040766 | G | A | 1/1 |
| 11 | chr6:32041006 | C | T | 32041006 | C | T | 1/1 |

**Supplementary Table 14. Variant calling results for all simulated homozygous pathogenic variants on *CYP21A2* with *CYP21A1P* masked and run with ploidy = 4.**

| Variant | Position      | REF | ALT | Called Position | Called REF | Called ALT | GT      |
|---------|---------------|-----|-----|-----------------|------------|------------|---------|
| 1       | chr6:32039081 | C   | G   | 32039081        | C          | G          | 0/0/1/1 |
| 2       | chr6:32038514 | C   | T   | 32038514        | C          | T          | 0/0/1/1 |
| 3       | chr6:32039162 | A   | C   | 32039162        | A          | C          | 0/0/1/1 |
| 4       | chr6:32039426 | T   | A   | 32039426        | T          | A          | 0/0/1/1 |
| 5       | chr6:32040110 | G   | C   | 32040110        | G          | C,T        | 1/1/2/2 |
| 6       | chr6:32040110 | G   | T   | 32040110        | G          | T          | 0/0/1/1 |
| 7       | chr6:32040140 | G   | A   | 32040140        | G          | A          | 0/0/1/1 |
| 8       | chr6:32040421 | C   | T   | 32040421        | C          | T          | 0/0/1/1 |
| 9       | chr6:32040535 | C   | T   | 32040535        | C          | T          | 1/1/1/1 |
| 10      | chr6:32040766 | G   | A   | 2040766         | G          | A          | 0/1/1/1 |
| 11      | chr6:32041006 | C   | T   | 32041006        | C          | T          | 1/1/1/1 |

**Supplementary Table 15. Variants called on *CYP21A2* when variant called with ploidy = 4 on the *CYP21A1P* masked reference genome when homozygous variant chr6:32040535 is simulated.**

| Chromosome | Position | Called REF | Called ALT | GT      |
|------------|----------|------------|------------|---------|
| chr6       | 32038419 | C          | T          | 0/0/0/1 |
| chr6       | 32038514 | C          | T          | 0/0/1/1 |
| chr6       | 32038844 | A          | C          | 0/0/1/1 |
| chr6       | 32038855 | T          | TTTG       | 0/0/1/1 |
| chr6       | 32038857 | A          | T          | 0/0/1/1 |
| chr6       | 32038867 | T          | G          | 0/0/1/1 |

|      |          |           |      |         |
|------|----------|-----------|------|---------|
| chr6 | 32038878 | C         | T    | 0/0/1/1 |
| chr6 | 32038895 | A         | G    | 0/0/1/1 |
| chr6 | 32038903 | A         | G    | 0/0/1/1 |
| chr6 | 32038911 | A         | G    | 0/0/1/1 |
| chr6 | 32038927 | A         | G    | 0/0/1/1 |
| chr6 | 32038938 | T         | G    | 0/0/1/1 |
| chr6 | 32038948 | T         | TC   | 0/0/1/1 |
| chr6 | 32038949 | T         | G    | 0/0/1/1 |
| chr6 | 32038955 | A         | T    | 0/0/1/1 |
| chr6 | 32038962 | A         | ATCC | 0/0/1/1 |
| chr6 | 32038971 | C         | A    | 0/0/1/1 |
| chr6 | 32038983 | TG        | T    | 0/0/1/1 |
| chr6 | 32038997 | TGG       | T    | 0/0/1/1 |
| chr6 | 32039001 | G         | C    | 0/0/1/1 |
| chr6 | 32039002 | G         | A    | 0/0/1/1 |
| chr6 | 32039007 | A         | AAG  | 0/0/1/1 |
| chr6 | 32039015 | G         | T    | 0/0/1/1 |
| chr6 | 32039020 | G         | A    | 0/0/1/1 |
| chr6 | 32039027 | C         | A    | 0/0/1/1 |
| chr6 | 32039046 | A         | G    | 0/0/1/1 |
| chr6 | 32039050 | G         | T    | 0/0/1/1 |
| chr6 | 32039055 | C         | G    | 0/0/1/1 |
| chr6 | 32039056 | A         | G    | 0/0/1/1 |
| chr6 | 32039081 | C         | G    | 0/0/1/1 |
| chr6 | 32039109 | G         | A    | 0/0/1/1 |
| chr6 | 32039128 | C         | G    | 0/0/1/1 |
| chr6 | 32039132 | GGAGACTAC | G    | 0/0/1/1 |
| chr6 | 32039143 | C         | T    | 0/0/1/1 |

|      |          |   |    |         |
|------|----------|---|----|---------|
| chr6 | 32039426 | T | A  | 0/0/1/1 |
| chr6 | 32039531 | C | A  | 0/0/1/1 |
| chr6 | 32039538 | T | C  | 0/0/1/1 |
| chr6 | 32039548 | C | G  | 0/0/1/1 |
| chr6 | 32039802 | T | C  | 0/0/1/1 |
| chr6 | 32039807 | T | A  | 0/0/1/1 |
| chr6 | 32039810 | T | A  | 0/0/1/1 |
| chr6 | 32039816 | T | A  | 0/0/1/1 |
| chr6 | 32039847 | A | G  | 0/0/1/1 |
| chr6 | 32039848 | C | T  | 0/0/1/1 |
| chr6 | 32040013 | C | G  | 0/0/1/1 |
| chr6 | 32040110 | G | T  | 0/0/1/1 |
| chr6 | 32040182 | G | GT | 0/0/1/1 |
| chr6 | 32040216 | G | C  | 0/0/1/1 |
| chr6 | 32040421 | C | T  | 0/0/1/1 |
| chr6 | 32040535 | C | T  | 1/1/1/1 |
| chr6 | 32040797 | G | A  | 0/0/0/1 |

**Supplementary Table 16. Variant calling results for simulated homozygous pathogenic variants on *CYP21A2* with MQ  $\geq$  20 filter and large inner distance between reads.**

| Variant | Position      | REF | ALT | Called Position | Called REF | Called ALT | GT  |
|---------|---------------|-----|-----|-----------------|------------|------------|-----|
| 1       | chr6:32039081 | C   | G   | 32039081        | C          | G          | 1/1 |
| 2       | chr6:32038514 | C   | T   | 32038514        | C          | T          | 1/1 |
| 3       | chr6:32039162 | A   | C   | 32039162        | A          | C          | 1/1 |
| 4       | chr6:32039426 | T   | A   | 32039426        | T          | A          | 1/1 |
| 5       | chr6:32040110 | G   | C   | 32040110        | G          | C          | 1/1 |
| 6       | chr6:32040110 | G   | T   | 32040110        | G          | T          | 1/1 |

|    |               |   |   |          |   |   |     |
|----|---------------|---|---|----------|---|---|-----|
| 7  | chr6:32040140 | G | A | 32040140 | G | A | 1/1 |
| 8  | chr6:32040421 | C | T | 32040421 | C | T | 1/1 |
| 9  | chr6:32040535 | C | T | 32040535 | C | T | 1/1 |
| 10 | chr6:32040766 | G | A | 2040766  | G | A | 1/1 |
| 11 | chr6:32041006 | C | T | 32041006 | C | T | 1/1 |

**Supplementary Table 17. Variant calling results for simulated homozygous variants on *SMN1*, *CORO1A* and *CBS* with the standard GATK variant calling pipeline, increased inner distance between reads and increased ploidy with masking of homologous regions.**

| Gene   | Chr | Position | REF Allele | ALT Allele | Pathogenicity | Standard Variant Calling Result | Increased Inner Distance Result | Increased Ploidy Result |
|--------|-----|----------|------------|------------|---------------|---------------------------------|---------------------------------|-------------------------|
| SMN1   | 5   | 70925108 | C          | G          | Pathogenic    | No call                         | No call                         | No call*                |
| SMN1   | 5   | 70942416 | C          | G          | Pathogenic    | No call                         | No call                         | 0/1/1/1*                |
| SMN1   | 5   | 70944713 | T          | A          | Pathogenic    | No call                         | No call                         | No call                 |
| SMN1   | 5   | 70942553 | C          | T          | Pathogenic    | No call                         | No call                         | 0/0/1/1                 |
| SMN1   | 5   | 70946127 | G          | T          | Pathogenic    | No call                         | No call                         | No call*                |
| CORO1A | 16  | 30188946 | G          | A          | Likely benign | No call                         | No call                         | No call                 |
| CBS    | 21  | 43058970 | T          | G          | Pathogenic    | No call                         | No call                         | 0/0/1/1*                |
| CBS    | 21  | 43059299 | T          | C          | Pathogenic    | No call                         | No call                         | No call                 |
| CBS    | 21  | 43060475 | C          | T          | Pathogenic    | No call                         | No call                         | No call                 |
| CBS    | 21  | 43065684 | C          | T          | Pathogenic    | No call                         | No call                         | No call                 |
| CBS    | 21  | 43072048 | G          | A          | Pathogenic    | No call                         | No call                         | No call                 |

\*Results for the given position, however other variants in different positions were also called.



**Supplementary Table 18. NBS gene list with identification (ID) codes, chromosome positioning on GRCh38 according to the ENSEMBL 94 annotation set and associated NBS disease.**

| Gene Name | HGNC ID  | Chromosome | Start     | End       | NBS Disease                                                          |
|-----------|----------|------------|-----------|-----------|----------------------------------------------------------------------|
| ABCD1     | HGNC:61  | X          | 153724868 | 153744762 | X-linked Adrenoleukodystrophy                                        |
| ACAD8     | HGNC:87  | 11         | 134253495 | 134265855 | Isovaleric Acidemia                                                  |
| ACADM     | HGNC:89  | 1          | 75724347  | 75787575  | Medium-chain Acyl-CoA Dehydrogenase Deficiency (MCAD)                |
| ACADS     | HGNC:90  | 12         | 120725735 | 120740008 | Medium-chain Acyl-CoA Dehydrogenase Deficiency (MCAD)                |
| ACADSB    | HGNC:91  | 10         | 123008979 | 123058311 | 3-Hydroxy-3-Methylglutaric Aciduria                                  |
| ACADVL    | HGNC:92  | 17         | 7217125   | 7225273   | Very Long-chain L-3-Hydroxyacyl-CoA Dehydrogenase Deficiency (VLCAD) |
| ACAT1     | HGNC:93  | 11         | 108121516 | 108147776 | B-Ketothiolase Deficiency (BKT)                                      |
| ADA       | HGNC:186 | 20         | 44619522  | 44652233  | SCID, T cell deficiency and IEM                                      |
| ADK       | HGNC:257 | 10         | 74151185  | 74709303  | Hypermethioninemia                                                   |
| AHCY      | HGNC:343 | 20         | 34280268  | 34311802  | Hypermethioninemia                                                   |
| AK2       | HGNC:362 | 1          | 33007940  | 33080996  | SCID and T cell defects                                              |
| ALDH7A1   | HGNC:877 | 5          | 126531200 | 126595418 | B6 Responsive Seizures                                               |
| ARG1      | HGNC:663 | 6          | 131573144 | 131584332 | Argininemia                                                          |
| ARPC1B    | HGNC:704 | 7          | 99374249  | 99394816  | SCID and T cell defects                                              |
| ARSA      | HGNC:713 | 22         | 50622754  | 50628173  | Metaomitic Leukodystrophy (MLD)                                      |
| ASL       | HGNC:746 | 7          | 66075798  | 66093558  | Argininosuccinic aciduria                                            |
| ASS1      | HGNC:758 | 9          | 130444929 | 130501274 | Citrullinemia Type I                                                 |
| ATM       | HGNC:795 | 11         | 108222484 | 108369102 | T cell defect, Ataxia Telangiectasia, low TRECs <sup>1</sup>         |
| BCKDHA    | HGNC:986 | 19         | 41397460  | 41425005  | Maple Syrup Urine Disease (MSUD)                                     |

|         |            |    |           |           |                                                          |
|---------|------------|----|-----------|-----------|----------------------------------------------------------|
| BCKDHB  | HGNC:987   | 6  | 80106647  | 80346270  | Maple Syrup Urine Disease (MSUD)                         |
| BCKDK   | HGNC:16902 | 16 | 31106107  | 31112791  | Branched-Chain Keto Acid Dehydrogenase Kinase Deficiency |
| BCL11B  | HGNC:13222 | 14 | 99169287  | 99271524  | Severe Combined Immunodeficiencies (SCID)                |
| BLNK    | HGNC:14211 | 10 | 96191702  | 96271587  | Antibody deficiency, low KRECs <sup>2</sup>              |
| BTD     | HGNC:1122  | 3  | 15601341  | 15647640  | Biotinidase Deficiency (BTD)                             |
| BTK     | HGNC:1133  | X  | 101349447 | 101390796 | Antibody deficiency, low KRECs <sup>2</sup>              |
| CARMIL2 | HGNC:27089 | 16 | 67644919  | 67657569  | Combined Immunodeficiency                                |
| CBS     | HGNC:1550  | 21 | 43053191  | 43076943  | Homocystinuria (HCY)                                     |
| CD247   | HGNC:1677  | 1  | 167430640 | 167518610 | Combined Immunodeficiency                                |
| CD3D    | HGNC:1673  | 11 | 118338954 | 118342744 | SCID and T cell defects                                  |
| CD3E    | HGNC:1674  | 11 | 118304545 | 118316175 | SCID and T cell defects                                  |
| CD3G    | HGNC:1675  | 11 | 118344344 | 118355161 | SCID and T cell defects                                  |
| CD40LG  | HGNC:11935 | X  | 136648193 | 136660390 | Antibody deficiency, low KRECs <sup>2</sup>              |
| CD79A   | HGNC:1698  | 19 | 41877120  | 41881372  | SCID and T cell defects                                  |
| CD79B   | HGNC:1699  | 17 | 63928740  | 63932354  | Antibody deficiency, low KRECs <sup>2</sup>              |
| CD8A    | HGNC:1706  | 2  | 86784610  | 86808396  | SCID and T cell defects                                  |
| CFTR    | HGNC:1884  | 7  | 117465784 | 117715971 | Cystic Fibrosis (CF)                                     |
| CHD7    | HGNC:20626 | 8  | 60678778  | 60868028  | CHARGE syndrome, thymic aplasia, low TRECs <sup>1</sup>  |
| CORO1A  | HGNC:2252  | 16 | 30182827  | 30189076  | SCID and T cell defects                                  |
| CPS1    | HGNC:2323  | 2  | 210477682 | 210679107 | Carbamoyl-phosphate Synthase Deficiency                  |
| CPT1A   | HGNC:2328  | 11 | 68754620  | 68844410  | Carnitine 1 Uptake Defect (CPT1)                         |
| CPT2    | HGNC:2330  | 1  | 53196429  | 53214197  | Carnitine 2 Uptake Defect (CPT1)                         |

|         |            |    |           |           |                                                   |
|---------|------------|----|-----------|-----------|---------------------------------------------------|
| CYP11A1 | HGNC:2590  | 15 | 74337759  | 74367740  | Congenital Adrenal Hyperplasia (CAH)              |
| CYP17A1 | HGNC:2593  | 10 | 102830531 | 102837533 | Congenital Adrenal Hyperplasia (CAH)              |
| CYP21A2 | HGNC:2600  | 6  | 32038265  | 32041670  | Congenital Adrenal Hyperplasia (CAH)              |
| DBT     | HGNC:2698  | 1  | 100186919 | 100249834 | Maple Syrup Urine Disease (MSUD)                  |
| DCLRE1C | HGNC:17642 | 10 | 14897359  | 14954432  | SCID and T cell defects                           |
| DKC1    | HGNC:2890  | X  | 154762742 | 154777689 | Combined Immunodeficiency, Dyskeratosis Congenita |
| DLD     | HGNC:2898  | 7  | 107890970 | 107931730 | Maple Syrup Urine Disease (MSUD)                  |
| DMD     | HGNC:2928  | X  | 31097677  | 33339441  | Duchenne Muscular Dystrophy                       |
| DNMT3B  | HGNC:2979  | 20 | 32762385  | 32809356  | SCID and T cell defects                           |
| DOCK2   | HGNC:2988  | 5  | 169637247 | 170083382 | SCID and T cell defects                           |
| DOCK8   | HGNC:19191 | 9  | 214854    | 465259    | Combined Immunodeficiency                         |
| EFL1    | HGNC:25789 | 15 | 82130230  | 82262763  | SCID and T cell defects                           |
| ETFA    | HGNC:3481  | 15 | 76215355  | 76311472  | Glutaric Acidemia Type II (GA2)                   |
| ETFB    | HGNC:3482  | 19 | 51345169  | 51366418  | Glutaric Acidemia Type II (GA2)                   |
| ETFDH   | HGNC:3483  | 4  | 158672125 | 158709623 | Glutaric Acidemia Type II (GA2)                   |
| EXTL3   | HGNC:3518  | 8  | 28600469  | 28755599  | SCID and T cell defects                           |
| FAH     | HGNC:3579  | 15 | 80152490  | 80186946  | Tyrosinemia Type I (TYR1)                         |
| FOXN1   | HGNC:12765 | 17 | 28506243  | 28538896  | SCID and T cell defects                           |
| GAA     | HGNC:4065  | 17 | 80101556  | 80119879  | Glycogen Storage Disease Type II (GSD II)         |
| GALE    | HGNC:4116  | 1  | 23795599  | 23800804  | Galactose epimerase Deficiency                    |
| GALK1   | HGNC:4118  | 17 | 75751594  | 75765711  | Galactokinase Deficiency                          |
| GALT    | HGNC:4135  | 9  | 34638133  | 34651035  | Classic Galactosemia                              |

|        |            |    |           |           |                                                                                                          |
|--------|------------|----|-----------|-----------|----------------------------------------------------------------------------------------------------------|
| GAMT   | HGNC:4136  | 19 | 1397026   | 1401570   | Cerebral Creatine Deficiency Syndrome 2                                                                  |
| GATA2  | HGNC:4171  | 3  | 128479427 | 128493185 | Combined Immunodeficiency                                                                                |
| GATM   | HGNC:4175  | 15 | 45361124  | 45402327  | Cerebral Creatine Deficiency Syndrome 3                                                                  |
| GCDH   | HGNC:4189  | 19 | 12891026  | 12914207  | Glutaric Acidemia Type I (GA1)                                                                           |
| HADHA  | HGNC:4801  | 2  | 26190635  | 26244726  | Trifunctional Protein Deficiency (TFP) / Long-chain L-3-Hydroxyacyl-CoA Dehydrogenase Deficiency (LCHAD) |
| HADHB  | HGNC:4803  | 2  | 26243170  | 26290468  | Trifunctional Protein Deficiency (TFP)                                                                   |
| HBB    | HGNC:4827  | 11 | 5225464   | 5229395   | Sickle Cell Anemia / Beta-Thalassemia                                                                    |
| HLCS   | HGNC:4976  | 21 | 36750888  | 36990236  | Holocarboxylase Synthase Deficiency                                                                      |
| HMGCL  | HGNC:5005  | 1  | 23801885  | 23838620  | 3-Hydroxy-3-Methylglutaric Aciduria                                                                      |
| HMGCS2 | HGNC:5008  | 1  | 119747996 | 119768905 | 3-Hydroxy-3-Methylglutaric Aciduria                                                                      |
| HPD    | HGNC:5147  | 12 | 121839527 | 121863596 | Tyrosinemia Type III (TYR III)                                                                           |
| HPGD   | HGNC:5154  | 4  | 174490177 | 174523154 | Not in NBS gene panel. Weak indication of NBS interest.                                                  |
| IDUA   | HGNC:5391  | 4  | 986997    | 1004506   | Mucopolysaccharidosis Type 1 (MPS I)                                                                     |
| IGHM   | HGNC:5541  | 14 | 105851705 | 105856218 | Antibody deficiency, low KRECs                                                                           |
| IGLL1  | HGNC:5870  | 22 | 23573125  | 23580308  | Antibody deficiency, low KRECs <sup>2</sup>                                                              |
| IKBKB  | HGNC:5960  | 8  | 42271302  | 42332653  | Combined Immunodeficiency                                                                                |
| IKZF1  | HGNC:13176 | 7  | 50304068  | 50405101  | SCID and T cell defects                                                                                  |
| IL2RG  | HGNC:6010  | X  | 71107404  | 71112108  | SCID and T cell defects                                                                                  |
| IL7R   | HGNC:6024  | 5  | 35852695  | 35879603  | SCID and T cell defects                                                                                  |

|        |            |    |           |           |                                                                        |
|--------|------------|----|-----------|-----------|------------------------------------------------------------------------|
| IVD    | HGNC:6186  | 15 | 40405795  | 40435947  | Isovaleric Acidemia (IVA)                                              |
| JAK3   | HGNC:6193  | 19 | 17824780  | 17848071  | Severe Combined Immunodeficiencies (SCID)                              |
| LAT    | HGNC:18874 | 16 | 28984826  | 28990783  | SCID and T cell defects                                                |
| LCK    | HGNC:6524  | 1  | 32251239  | 32286165  | Combined Immunodeficiency                                              |
| LIG4   | HGNC:6601  | 13 | 108207439 | 108218368 | SCID and T cell defects                                                |
| LMBRD1 | HGNC:23038 | 6  | 69675793  | 69867236  | Methylmalonic Acidemia (MMA)                                           |
| LRR8A  | HGNC:19027 | 9  | 128882112 | 128918039 | Antibody deficiency, low KRECs <sup>2</sup>                            |
| LRR8B  | HGNC:30692 | 1  | 89524836  | 89597864  | LRR8A paralog. Not in NBS gene panel. Weak indication of NBS interest. |
| LRR8C  | HGNC:25075 | 1  | 89633072  | 89769903  | LRR8A paralog. Not in NBS gene panel. Weak indication of NBS interest. |
| LRR8D  | HGNC:16992 | 1  | 89821014  | 89936611  | LRR8A paralog. Not in NBS gene panel. Weak indication of NBS interest. |
| LRR8E  | HGNC:26272 | 19 | 7888505   | 7902021   | LRR8A paralog. Not in NBS gene panel. Weak indication of NBS interest. |
| MAT1A  | HGNC:6903  | 10 | 80271820  | 80289684  | Hypermethioninemia                                                     |
| MC2R   | HGNC:6930  | 18 | 13882044  | 13915707  | Congenital Adrenal Hyperplasia (CAH)                                   |
| MCCC1  | HGNC:6936  | 3  | 183015218 | 183116075 | 3-Methylcrotonyl-CoA Carboxylase Deficiency                            |
| MCCC2  | HGNC:6937  | 5  | 71587288  | 71658704  | 3-Methylcrotonyl-CoA Carboxylase Deficiency                            |
| MMAA   | HGNC:18871 | 4  | 145599042 | 145660035 | Methylmalonic Acidemia (MMA)                                           |
| MMAB   | HGNC:19331 | 12 | 109553737 | 109573874 | Methylmalonic Acidemia (MMA)                                           |
| MMACHC | HGNC:24525 | 1  | 45500053  | 45513382  | Methylmalonic Acidemia (MMA)/Homocystinuria (HCY)                      |
| MMADHC | HGNC:25221 | 2  | 149569634 | 149587816 | Methylmalonic Acidemia (MMA)/Homocystinuria (HCY)                      |

|        |            |    |           |           |                                                                   |
|--------|------------|----|-----------|-----------|-------------------------------------------------------------------|
| MTHFR  | HGNC:7436  | 1  | 11785723  | 11806920  | Homocystinuria (HCY)                                              |
| MTR    | HGNC:7468  | 1  | 236795281 | 236903981 | Homocystinuria (HCY)                                              |
| MTRR   | HGNC:7473  | 5  | 7851186   | 7906025   | Homocystinuria (HCY)                                              |
| MUT    | HGNC:7526  | 6  | 49430360  | 49463191  | Methylmalonic Acidemia (MMA)                                      |
| NADK2  | HGNC:26404 | 5  | 36192592  | 36242279  | 2,4 Dienoyl-CoA Reductase Deficiency                              |
| NAGS   | HGNC:17996 | 17 | 44004546  | 44009063  | Ornithine Transcarbamylase Deficiency                             |
| NBN    | HGNC:7652  | 8  | 89933336  | 90003228  | T cell defect, Nijmegen breakage syndrome, low TRECs <sup>1</sup> |
| NHEJ1  | HGNC:25737 | 2  | 219075317 | 219160865 | SCID and T cell defects                                           |
| NPC1   | HGNC:7897  | 18 | 23506184  | 23586898  | Niemann–Pick Disease Type C1                                      |
| NPC2   | HGNC:14537 | 14 | 74476192  | 74494177  | Niemann–Pick Disease Type C2                                      |
| NUDCD3 | HGNC:22208 | 7  | 44379121  | 44490880  | Not in NBS gene panel. Weak indication of NBS interest.           |
| OTC    | HGNC:8512  | X  | 38352545  | 38421450  | Ornithine Transcarbamylase Deficiency                             |
| PCBD1  | HGNC:8646  | 10 | 70882280  | 70888784  | Hyperphenylalaninemia                                             |
| PCCA   | HGNC:8653  | 13 | 100089015 | 100530437 | Propionic Acidemia (PKU)                                          |
| PCCB   | HGNC:8654  | 3  | 136250306 | 136337896 | Propionic Acidemia (PKU)                                          |
| PGM3   | HGNC:8907  | 6  | 83161150  | 83193936  | SCID, T cell deficiency and IEM                                   |
| PIK3CD | HGNC:8977  | 1  | 9651732   | 9729114   | Combined Immunodeficiency                                         |
| PIK3R1 | HGNC:8979  | 5  | 68215720  | 68301821  | Antibody deficiency, low KRECs <sup>2</sup>                       |
| PAH    | HGNC:8582  | 12 | 102836885 | 102958410 | Phenylketonuria (PKU)                                             |
| PAX1   | HGNC:8615  | 20 | 21705659  | 21718486  | Otofaciocervical syndrome, thymic aplasia, low TRECs <sup>1</sup> |
| PNP    | HGNC:7892  | 14 | 20468954  | 20477094  | SCID, T cell deficiency and IEM                                   |

|          |            |    |           |           |                                                             |
|----------|------------|----|-----------|-----------|-------------------------------------------------------------|
| POR      | HGNC:9208  | 7  | 75899200  | 75986855  | Congenital Adrenal Hyperplasia (CAH)                        |
| PRKDC    | HGNC:9413  | 8  | 47773108  | 47960183  | Combined Immunodeficiency                                   |
| PSAP     | HGNC:9498  | 10 | 71816298  | 71851375  | Metaomitic Leukodystrophy (MLD)                             |
| PSAT1    | HGNC:19129 | 9  | 78297143  | 78330093  | Neu-Laxova syndrome 2, differentiation to PSPH deficiency   |
| PSPH     | HGNC:9577  | 7  | 56011051  | 56051604  | Phosphoserine Phosphatase Deficiency                        |
| PTPRC    | HGNC:9666  | 1  | 198638457 | 198757476 | Combined Immunodeficiency)                                  |
| PTS      | HGNC:9689  | 11 | 112226365 | 112269955 | Hyperphenylalaninemia                                       |
| QDPR     | HGNC:9752  | 4  | 17460261  | 17512234  | Hyperphenylalaninemia                                       |
| RAC2     | HGNC:9802  | 22 | 37225261  | 37244448  | Combined Immunodeficiency                                   |
| RAG1     | HGNC:9831  | 11 | 36510709  | 36593156  | SCID and T cell defects                                     |
| RAG2     | HGNC:9832  | 11 | 36575574  | 36598279  | SCID and T cell defects                                     |
| RECQL4   | HGNC:9949  | 8  | 144511288 | 144517845 | SCID and T cell defects                                     |
| RMRP     | HGNC:10031 | 9  | 35657754  | 35658017  | SCID and T cell defects                                     |
| SBDS     | HGNC:19440 | 7  | 66987677  | 66995601  | SCID and T cell defects)                                    |
| SLC16A1  | HGNC:10922 | 1  | 112911847 | 112957013 | Monocarboxylate Transporter 1 Deficiency                    |
| SLC22A5  | HGNC:10969 | 5  | 132369752 | 132395614 | Carnitine Uptake Defect (CUD)                               |
| SLC25A13 | HGNC:10983 | 7  | 96120220  | 96322147  | Citrullinemia Type II                                       |
| SLC25A15 | HGNC:10985 | 13 | 40789412  | 40810111  | Hyperornithinemia-Hyperammonemia-Homocitrullinuria Syndrome |
| SLC25A20 | HGNC:1421  | 3  | 48856931  | 48898993  | Carnitine Acylcarnitine Translocase Deficiency (CACT)       |
| SLC46A1  | HGNC:30521 | 17 | 28394756  | 28407197  | SCID and T cell defects                                     |
| SLC52A2  | HGNC:30224 | 8  | 144354135 | 144361286 | Brown-Vialetto-Van Laere syndrome 2, Vitamin B2 responsive  |

|          |            |    |           |           |                                                                                                             |
|----------|------------|----|-----------|-----------|-------------------------------------------------------------------------------------------------------------|
| SLC52A3  | HGNC:16187 | 20 | 760080    | 776015    | Brown-Vialetto-Van Laere syndrome 1, Vitamin B2 responsive                                                  |
| SLC6A8   | HGNC:11055 | X  | 153688099 | 153696593 | Cerebral Creatine Deficiency Syndrome 1                                                                     |
| SMARCAL1 | HGNC:11102 | 2  | 216412414 | 216483053 | Combined Immunodeficiency                                                                                   |
| SMN1     | HGNC:11117 | 5  | 70925030  | 70953942  | Spinal Muscular Atrophy (SMA)                                                                               |
| SMN2     | HGNC:11118 | 5  | 70049612  | 70078522  | Spinal Muscular Atrophy (SMA)                                                                               |
| STAT5B   | HGNC:11367 | 17 | 42199168  | 42276707  | SCID and T cell defects                                                                                     |
| STIM1    | HGNC:11386 | 11 | 3854527   | 4093210   | SCID and T cell defects                                                                                     |
| TAT      | HGNC:11573 | 16 | 71565660  | 71577130  | Tyrosinemia Type II (TYR II)                                                                                |
| TBX1     | HGNC:11592 | 22 | 19756703  | 19783593  | DiGeorge syndrome, thymic aplasia, low TRECs <sup>1</sup>                                                   |
| TCF3     | HGNC:11633 | 19 | 1609290   | 1652605   | Antibody deficiency, low KRECs <sup>2</sup> , Only 1 variant: NM_001136139.2(TCF3): c.1663G>A (p.Glu555Lys) |
| TTC7A    | HGNC:19750 | 2  | 46916157  | 47076137  | SCID and T cell defects                                                                                     |
| UNC119   | HGNC:12565 | 17 | 28546707  | 28552668  | Antibody deficiency, low KRECs <sup>2</sup>                                                                 |
| WAS      | HGNC:12731 | X  | 48676596  | 48691427  | Combined Immunodeficiency                                                                                   |
| ZAP70    | HGNC:12858 | 2  | 97713560  | 97739862  | SCID and T cell defects                                                                                     |
| ZBTB24   | HGNC:21143 | 6  | 109462594 | 109483237 | SCID and T cell defects                                                                                     |

<sup>1</sup> T cell receptor excision circles (TRECs) can be used to identify impaired T cell development in primary immunodeficiencies.

<sup>2</sup> kappa-deleting recombination excision circles (KRECs) can be used to detect impaired B cell development in primary immunodeficiencies.



**Supplementary Table 19. Sample information for simulated genomes.**

| <b>Sample ID</b> | <b>Population Code</b> | <b>Location</b>                | <b>Superpopulation Code</b> | <b>Superpopulation</b> |
|------------------|------------------------|--------------------------------|-----------------------------|------------------------|
| NA20882          | GIH                    | Gujarati Indian in Houston, TX | SAS                         | South Asian            |
| NA20854          | GIH                    | Gujarati Indian in Houston, TX | SAS                         | South Asian            |
| NA20856          | GIH                    | Gujarati Indian in Houston, TX | SAS                         | South Asian            |
| NA20862          | GIH                    | Gujarati Indian in Houston, TX | SAS                         | South Asian            |
| NA20868          | GIH                    | Gujarati Indian in Houston, TX | SAS                         | South Asian            |
| NA20874          | GIH                    | Gujarati Indian in Houston, TX | SAS                         | South Asian            |
| NA20876          | GIH                    | Gujarati Indian in Houston, TX | SAS                         | South Asian            |
| NA20881          | GIH                    | Gujarati Indian in Houston, TX | SAS                         | South Asian            |
| NA20899          | GIH                    | Gujarati Indian in Houston, TX | SAS                         | South Asian            |
| NA20902          | GIH                    | Gujarati Indian in Houston, TX | SAS                         | South Asian            |
| HG00174          | FIN                    | Finland                        | EUR                         | European               |
| HG00176          | FIN                    | Finland                        | EUR                         | European               |
| HG00272          | FIN                    | Finland                        | EUR                         | European               |
| HG00276          | FIN                    | Finland                        | EUR                         | European               |
| HG00288          | FIN                    | Finland                        | EUR                         | European               |
| HG00309          | FIN                    | Finland                        | EUR                         | European               |
| HG00331          | FIN                    | Finland                        | EUR                         | European               |
| HG00334          | FIN                    | Finland                        | EUR                         | European               |
| HG00377          | FIN                    | Finland                        | EUR                         | European               |
| HG00378          | FIN                    | Finland                        | EUR                         | European               |
| HG00404          | CHS                    | Han Chinese in Beijing, China  | EAS                         | East Asian             |

|         |     |                                        |     |                  |
|---------|-----|----------------------------------------|-----|------------------|
| HG00419 | CHS | Han Chinese in Beijing, China          | EAS | East Asian       |
| HG00437 | CHS | Han Chinese in Beijing, China          | EAS | East Asian       |
| HG00531 | CHS | Han Chinese in Beijing, China          | EAS | East Asian       |
| HG00566 | CHS | Han Chinese in Beijing, China          | EAS | East Asian       |
| HG00608 | CHS | Han Chinese in Beijing, China          | EAS | East Asian       |
| HG00632 | CHS | Han Chinese in Beijing, China          | EAS | East Asian       |
| HG00654 | CHS | Han Chinese in Beijing, China          | EAS | East Asian       |
| HG00675 | CHS | Han Chinese in Beijing, China          | EAS | East Asian       |
| HG00428 | CHS | Han Chinese in Beijing, China          | EAS | East Asian       |
| HG01119 | CLM | Colombians from Medellin, Colombia     | AMR | Admixed American |
| HG01251 | CLM | Colombians from Medellin, Colombia     | AMR | Admixed American |
| HG01345 | CLM | Colombians from Medellin, Colombia     | AMR | Admixed American |
| HG01366 | CLM | Colombians from Medellin, Colombia     | AMR | Admixed American |
| HG01375 | CLM | Colombians from Medellin, Colombia     | AMR | Admixed American |
| HG01390 | CLM | Colombians from Medellin, Colombia     | AMR | Admixed American |
| HG01444 | CLM | Colombians from Medellin, Colombia     | AMR | Admixed American |
| HG01456 | CLM | Colombians from Medellin, Colombia     | AMR | Admixed American |
| HG01468 | CLM | Colombians from Medellin, Colombia     | AMR | Admixed American |
| HG01134 | CLM | Colombians from Medellin, Colombia     | AMR | Admixed American |
| HG02646 | GWD | Gambian in Western Division – Mandinka | AFR | African          |

|         |     |                                           |     |         |
|---------|-----|-------------------------------------------|-----|---------|
| HG02667 | GWD | Gambian in Western Division<br>– Mandinka | AFR | African |
| HG02763 | GWD | Gambian in Western Division<br>– Mandinka | AFR | African |
| HG02772 | GWD | Gambian in Western Division<br>– Mandinka | AFR | African |
| HG02805 | GWD | Gambian in Western Division<br>– Mandinka | AFR | African |
| HG02837 | GWD | Gambian in Western Division<br>– Mandinka | AFR | African |
| HG02879 | GWD | Gambian in Western Division<br>– Mandinka | AFR | African |
| HG02891 | GWD | Gambian in Western Division<br>– Mandinka | AFR | African |
| HG03046 | GWD | Gambian in Western Division<br>– Mandinka | AFR | African |
| HG03539 | GWD | Gambian in Western Division<br>– Mandinka | AFR | African |

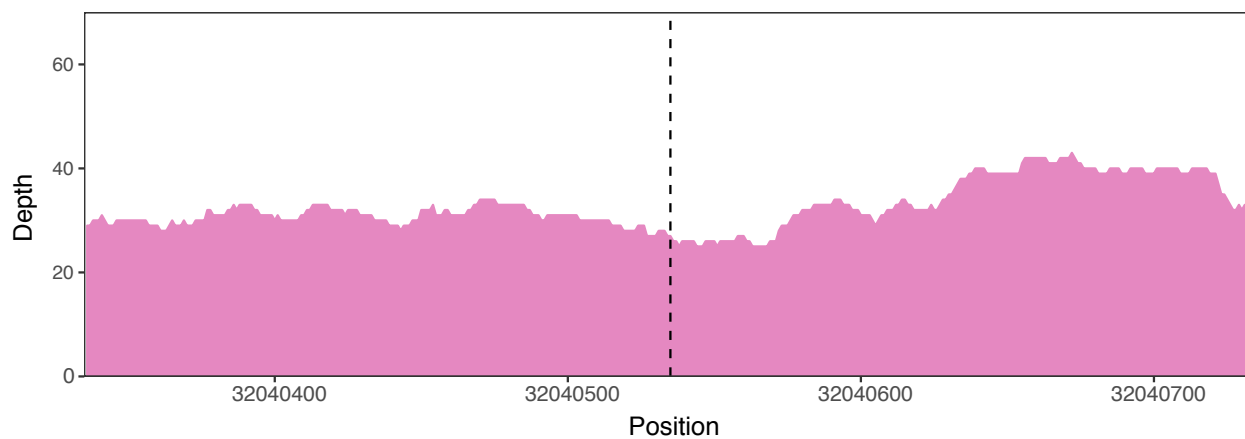

**Supplementary Figure 1. Depth of mapping coverage of across *CYP21A2* when a homozygous pathogenic variant is inserted at position chr6:32040535 and 150bp reads are simulated with a 255bp inner distance.**
